# Supplementary material for: Mining Functional Modules in Heterogeneous Biological Networks Using Multiplex PageRank Approach
Source: Front Plant Sci. 2016 Jun 22;7:903. doi: 10.3389/fpls.2016.00903 (PMC4916224; doi:10.3389/fpls.2016.00903)
Supplement: Supplementary file 3 [file Table3.XLS]

## Sheet: Table2_GO_Enrichment_cell_cycle
GO_acc	term_type	Term	queryitem	querytotal	bgitem	bgtotal	pvalue	FDR	entries
GO:0007049	P	cell cycle	46	70	802	28397	3.4e-53	5.9e-50	// AT1G15570 // AT1G20930 // AT5G48600 // AT3G49240 // AT2G01910 // AT1G73690 // AT1G02970 // AT2G45490 // AT1G04730 // AT1G16330 // AT5G45550 // AT4G02070 // AT5G65420 // AT3G55000 // AT5G43080 // AT5G67260 // AT1G76540 // AT3G07160 // AT3G11520 // AT1G80370 // AT4G22910 // AT1G44110 // AT5G37630 // AT2G46560 // AT2G27970 // AT1G47870 // AT3G48750 // AT5G11510 // AT4G21270 // AT4G04670 // AT3G50…
GO:0022402	P	cell cycle process	41	70	586	28397	7e-50	6e-47	// AT1G15570 // AT1G20930 // AT5G48600 // AT3G49240 // AT2G01910 // AT1G73690 // AT1G02970 // AT2G45490 // AT1G04730 // AT4G02070 // AT5G65420 // AT3G55000 // AT5G43080 // AT4G21270 // AT1G76540 // AT3G07160 // AT3G11520 // AT1G80370 // AT4G22910 // AT1G44110 // AT5G37630 // AT2G46560 // AT2G27970 // AT1G47870 // AT3G48750 // AT5G11510 // AT4G04670 // AT3G50070 // AT2G35630 // AT3G50630 // AT1G47…
GO:0051726	P	regulation of cell cycle	35	70	293	28397	1.7e-49	1e-46	// AT1G15570 // AT5G48600 // AT3G49240 // AT1G44110 // AT1G73690 // AT3G50070 // AT1G20930 // AT1G16330 // AT4G02070 // AT5G65420 // AT5G43080 // AT5G67260 // AT1G76540 // AT3G11520 // AT1G80370 // AT4G22910 // AT1G02970 // AT2G27970 // AT3G48750 // AT5G11510 // AT4G21270 // AT2G35630 // AT3G50630 // AT2G26760 // AT1G47210 // AT4G19600 // AT2G04660 // AT2G36010 // AT1G18040 // AT5G27620 // AT4G34…
GO:0006260	P	DNA replication	30	70	337	28397	2.1e-38	9.3e-36	// AT1G15570 // AT1G04730 // AT5G48600 // AT1G44110 // AT1G73690 // AT3G50070 // AT1G20930 // AT4G02070 // AT5G65420 // AT4G21270 // AT1G76540 // AT3G11520 // AT1G80370 // AT3G01330 // AT1G02970 // AT2G27970 // AT5G11510 // AT3G48750 // AT1G47870 // AT3G50630 // AT4G22910 // AT2G04660 // AT2G36010 // AT1G18040 // AT5G27620 // AT4G34160 // AT5G48820 // AT3G60840 // AT5G13840 // AT4G37490
GO:0006261	P	DNA-dependent DNA replication	28	70	256	28397	4.6e-38	1.6e-35	// AT1G15570 // AT1G04730 // AT5G48600 // AT1G44110 // AT1G73690 // AT3G50070 // AT1G20930 // AT4G02070 // AT5G65420 // AT1G76540 // AT3G11520 // AT1G80370 // AT3G01330 // AT1G02970 // AT2G27970 // AT5G11510 // AT3G48750 // AT1G47870 // AT4G22910 // AT2G04660 // AT2G36010 // AT1G18040 // AT5G27620 // AT4G34160 // AT5G48820 // AT3G60840 // AT5G13840 // AT3G50630
GO:0042023	P	DNA endoreduplication	23	70	121	28397	3.6e-36	9e-34	// AT1G15570 // AT1G73690 // AT1G02970 // AT1G20930 // AT4G22910 // AT1G76540 // AT3G11520 // AT1G80370 // AT5G65420 // AT3G50070 // AT2G27970 // AT5G11510 // AT3G48750 // AT1G47870 // AT2G04660 // AT2G36010 // AT1G18040 // AT5G27620 // AT4G34160 // AT5G48820 // AT3G60840 // AT5G13840 // AT3G50630
GO:0000278	P	mitotic cell cycle	28	70	302	28397	3.5e-36	9e-34	// AT1G15570 // AT5G48600 // AT1G44110 // AT1G73690 // AT3G50070 // AT2G45490 // AT1G20930 // AT5G65420 // AT5G43080 // AT4G21270 // AT1G76540 // AT3G07160 // AT3G11520 // AT1G80370 // AT5G37630 // AT1G02970 // AT2G27970 // AT3G48750 // AT5G11510 // AT2G35630 // AT1G47210 // AT3G50630 // AT1G18040 // AT5G27620 // AT4G34160 // AT5G48820 // AT3G60840 // AT4G37490
GO:0006259	P	DNA metabolic process	35	70	790	28397	3.2e-35	6.8e-33	// AT1G15570 // AT1G20930 // AT5G48600 // AT1G44110 // AT1G73690 // AT3G50070 // AT1G04730 // AT4G02070 // AT5G65420 // AT3G55000 // AT5G43080 // AT4G21270 // AT1G76540 // AT3G11520 // AT1G80370 // AT4G22910 // AT1G02970 // AT2G27970 // AT1G47870 // AT3G48750 // AT5G11510 // AT4G04670 // AT2G35630 // AT3G50630 // AT3G01330 // AT2G04660 // AT2G36010 // AT1G18040 // AT5G27620 // AT4G34160 // AT5G48…
GO:0010564	P	regulation of cell cycle process	23	70	144	28397	1.4e-34	2.7e-32	// AT1G15570 // AT5G48600 // AT3G49240 // AT1G44110 // AT1G20930 // AT4G22910 // AT5G43080 // AT4G21270 // AT1G76540 // AT3G11520 // AT1G80370 // AT1G02970 // AT3G48750 // AT5G11510 // AT2G35630 // AT1G47210 // AT2G04660 // AT1G18040 // AT4G34160 // AT5G48820 // AT3G60840 // AT5G13840 // AT4G37490
GO:0000079	P	regulation of cyclin-dependent protein kinase activity	19	70	60	28397	1.4e-33	2.5e-31	// AT5G43080 // AT1G15570 // AT1G76540 // AT4G19600 // AT3G50070 // AT1G47210 // AT3G50630 // AT1G44110 // AT1G73690 // AT1G18040 // AT5G27620 // AT5G48820 // AT3G11520 // AT2G27970 // AT1G80370 // AT4G37490 // AT3G48750 // AT2G26760 // AT5G65420
GO:0051301	P	cell division	27	70	363	28397	2.1e-32	3.3e-30	// AT1G15570 // AT5G48600 // AT3G49240 // AT1G44110 // AT1G02970 // AT2G45490 // AT1G20930 // AT4G22910 // AT3G55000 // AT4G21270 // AT1G76540 // AT3G11520 // AT5G10480 // AT2G46560 // AT1G47870 // AT3G48750 // AT5G11510 // AT2G35630 // AT2G04660 // AT2G36010 // AT1G18040 // AT4G34160 // AT5G48820 // AT3G60840 // AT1G77720 // AT5G13840 // AT4G37490
GO:0042325	P	regulation of phosphorylation	20	70	95	28397	3.2e-32	4.7e-30	// AT5G10480 // AT1G15570 // AT1G76540 // AT4G19600 // AT3G50070 // AT5G43080 // AT3G50630 // AT1G44110 // AT1G73690 // AT1G18040 // AT5G27620 // AT5G48820 // AT3G11520 // AT1G47210 // AT2G27970 // AT1G80370 // AT4G37490 // AT3G48750 // AT2G26760 // AT5G65420
GO:0045859	P	regulation of protein kinase activity	19	70	89	28397	1e-30	1.3e-28	// AT5G43080 // AT1G15570 // AT1G76540 // AT4G19600 // AT3G50070 // AT1G47210 // AT3G50630 // AT1G44110 // AT1G73690 // AT1G18040 // AT5G27620 // AT5G48820 // AT3G11520 // AT2G27970 // AT1G80370 // AT4G37490 // AT3G48750 // AT2G26760 // AT5G65420
GO:0043549	P	regulation of kinase activity	19	70	89	28397	1e-30	1.3e-28	// AT5G43080 // AT1G15570 // AT1G76540 // AT4G19600 // AT3G50070 // AT1G47210 // AT3G50630 // AT1G44110 // AT1G73690 // AT1G18040 // AT5G27620 // AT5G48820 // AT3G11520 // AT2G27970 // AT1G80370 // AT4G37490 // AT3G48750 // AT2G26760 // AT5G65420
GO:0051338	P	regulation of transferase activity	19	70	93	28397	2.2e-30	2.5e-28	// AT5G43080 // AT1G15570 // AT1G76540 // AT4G19600 // AT3G50070 // AT1G47210 // AT3G50630 // AT1G44110 // AT1G73690 // AT1G18040 // AT5G27620 // AT5G48820 // AT3G11520 // AT2G27970 // AT1G80370 // AT4G37490 // AT3G48750 // AT2G26760 // AT5G65420
GO:0022403	P	cell cycle phase	25	70	352	28397	1.9e-29	2e-27	// AT1G15570 // AT5G48600 // AT2G01910 // AT1G20930 // AT4G02070 // AT5G43080 // AT4G21270 // AT1G76540 // AT3G07160 // AT3G11520 // AT1G80370 // AT1G44110 // AT5G37630 // AT1G02970 // AT3G48750 // AT5G11510 // AT4G04670 // AT2G35630 // AT1G47210 // AT1G18040 // AT4G34160 // AT5G48820 // AT3G60840 // AT5G13840 // AT4G37490
GO:0006275	P	regulation of DNA replication	19	70	135	28397	1.4e-27	1.4e-25	// AT1G15570 // AT4G21270 // AT1G76540 // AT5G48600 // AT2G04660 // AT2G36010 // AT1G44110 // AT5G11510 // AT1G18040 // AT1G02970 // AT4G34160 // AT5G48820 // AT3G11520 // AT3G60840 // AT1G20930 // AT5G13840 // AT4G02070 // AT1G80370 // AT4G22910
GO:0010440	P	stomatal lineage progression	16	70	58	28397	1.7e-27	1.6e-25	// AT1G15570 // AT5G67260 // AT1G76540 // AT3G50070 // AT3G50630 // AT3G48750 // AT1G73690 // AT1G18040 // AT5G27620 // AT2G27970 // AT5G48820 // AT3G11520 // AT1G16330 // AT4G37490 // AT2G26760 // AT5G65420
GO:0000910	P	cytokinesis	21	70	235	28397	1.2e-26	1.1e-24	// AT3G55000 // AT1G15570 // AT4G21270 // AT1G76540 // AT5G48600 // AT1G44110 // AT5G11510 // AT2G46560 // AT1G18040 // AT1G02970 // AT4G34160 // AT5G48820 // AT2G45490 // AT3G60840 // AT1G20930 // AT1G77720 // AT2G35630 // AT3G11520 // AT5G13840 // AT4G37490 // AT3G48750
GO:0010389	P	regulation of G2/M transition of mitotic cell cycle	16	70	69	28397	1.9e-26	1.7e-24	// AT5G43080 // AT1G15570 // AT4G21270 // AT1G76540 // AT5G48600 // AT1G44110 // AT5G11510 // AT1G18040 // AT1G02970 // AT4G34160 // AT5G48820 // AT3G11520 // AT3G60840 // AT1G20930 // AT1G47210 // AT1G80370
GO:0000086	P	G2/M transition of mitotic cell cycle	16	70	70	28397	2.4e-26	1.9e-24	// AT5G43080 // AT1G15570 // AT4G21270 // AT1G76540 // AT5G48600 // AT1G44110 // AT5G11510 // AT1G18040 // AT1G02970 // AT4G34160 // AT5G48820 // AT3G11520 // AT3G60840 // AT1G20930 // AT1G47210 // AT1G80370
GO:0051052	P	regulation of DNA metabolic process	20	70	198	28397	2.3e-26	1.9e-24	// AT1G15570 // AT4G21270 // AT1G76540 // AT1G20930 // AT5G48600 // AT2G04660 // AT2G36010 // AT1G44110 // AT5G11510 // AT1G18040 // AT1G02970 // AT4G34160 // AT5G48820 // AT3G11520 // AT3G60840 // AT4G04670 // AT5G13840 // AT4G02070 // AT1G80370 // AT4G22910
GO:0000911	P	cytokinesis by cell plate formation	20	70	204	28397	4e-26	3e-24	// AT3G55000 // AT1G15570 // AT4G21270 // AT1G76540 // AT5G48600 // AT1G44110 // AT5G11510 // AT2G46560 // AT1G18040 // AT1G02970 // AT4G34160 // AT5G48820 // AT2G45490 // AT3G60840 // AT1G20930 // AT1G77720 // AT2G35630 // AT3G11520 // AT5G13840 // AT4G37490
GO:0051329	P	interphase of mitotic cell cycle	16	70	73	28397	4.3e-26	3.1e-24	// AT5G43080 // AT1G15570 // AT4G21270 // AT1G76540 // AT5G48600 // AT1G44110 // AT5G11510 // AT1G18040 // AT1G02970 // AT4G34160 // AT5G48820 // AT3G11520 // AT3G60840 // AT1G20930 // AT1G47210 // AT1G80370
GO:0051325	P	interphase	16	70	74	28397	5.3e-26	3.7e-24	// AT5G43080 // AT1G15570 // AT4G21270 // AT1G76540 // AT5G48600 // AT1G44110 // AT5G11510 // AT1G18040 // AT1G02970 // AT4G34160 // AT5G48820 // AT3G11520 // AT3G60840 // AT1G20930 // AT1G47210 // AT1G80370
GO:0033205	P	cytokinesis during cell cycle	20	70	208	28397	5.7e-26	3.8e-24	// AT3G55000 // AT1G15570 // AT4G21270 // AT1G76540 // AT5G48600 // AT1G44110 // AT5G11510 // AT2G46560 // AT1G18040 // AT1G02970 // AT4G34160 // AT5G48820 // AT2G45490 // AT3G60840 // AT1G20930 // AT1G77720 // AT2G35630 // AT3G11520 // AT5G13840 // AT4G37490
GO:0010374	P	stomatal complex development	20	70	217	28397	1.3e-25	8.1e-24	// AT1G15570 // AT5G67260 // AT1G76540 // AT3G50070 // AT3G50630 // AT1G44110 // AT1G73690 // AT1G18040 // AT5G27620 // AT2G27970 // AT4G34160 // AT2G25880 // AT3G11520 // AT5G48820 // AT1G16330 // AT1G80370 // AT4G37490 // AT3G48750 // AT2G26760 // AT5G65420
GO:0019220	P	regulation of phosphate metabolic process	20	70	231	28397	4.1e-25	2.4e-23	// AT5G10480 // AT1G15570 // AT1G76540 // AT4G19600 // AT3G50070 // AT5G43080 // AT3G50630 // AT1G44110 // AT1G73690 // AT1G18040 // AT5G27620 // AT5G48820 // AT3G11520 // AT1G47210 // AT2G27970 // AT1G80370 // AT4G37490 // AT3G48750 // AT2G26760 // AT5G65420
GO:0051174	P	regulation of phosphorus metabolic process	20	70	231	28397	4.1e-25	2.4e-23	// AT5G10480 // AT1G15570 // AT1G76540 // AT4G19600 // AT3G50070 // AT5G43080 // AT3G50630 // AT1G44110 // AT1G73690 // AT1G18040 // AT5G27620 // AT5G48820 // AT3G11520 // AT1G47210 // AT2G27970 // AT1G80370 // AT4G37490 // AT3G48750 // AT2G26760 // AT5G65420
GO:0031323	P	regulation of cellular metabolic process	43	70	2928	28397	5e-25	2.9e-23	// AT1G15570 // AT5G48600 // AT1G44110 // AT1G73690 // AT1G02970 // AT2G45490 // AT1G20930 // AT4G02070 // AT5G65420 // AT5G43080 // AT4G21270 // AT1G76540 // AT3G11520 // AT1G80370 // AT1G43190 // AT2G25880 // AT5G10480 // AT4G16970 // AT2G27970 // AT5G11510 // AT3G48750 // AT1G47870 // AT4G04670 // AT3G50070 // AT2G35630 // AT3G50630 // AT5G62020 // AT1G79280 // AT2G26760 // AT4G22910 // AT3G01…
GO:0000226	P	microtubule cytoskeleton organization	20	70	246	28397	1.3e-24	7.5e-23	// AT3G55000 // AT2G46560 // AT4G21270 // AT1G76540 // AT2G01910 // AT5G11510 // AT1G15570 // AT1G18040 // AT1G02970 // AT4G34160 // AT5G48820 // AT2G45490 // AT3G60840 // AT1G20930 // AT1G77720 // AT2G35630 // AT3G11520 // AT1G79280 // AT5G13840 // AT4G37490
GO:0000279	P	M phase	21	70	306	28397	2.2e-24	1.2e-22	// AT5G37630 // AT1G15570 // AT4G21270 // AT1G76540 // AT1G20930 // AT5G48600 // AT3G07160 // AT2G01910 // AT5G11510 // AT1G18040 // AT1G02970 // AT4G34160 // AT5G48820 // AT3G11520 // AT3G60840 // AT4G04670 // AT5G13840 // AT2G35630 // AT4G02070 // AT4G37490 // AT3G48750
GO:0019222	P	regulation of metabolic process	43	70	3186	28397	1.4e-23	7.3e-22	// AT1G15570 // AT5G48600 // AT1G44110 // AT1G73690 // AT1G02970 // AT2G45490 // AT1G20930 // AT4G02070 // AT5G65420 // AT5G43080 // AT4G21270 // AT1G76540 // AT3G11520 // AT1G80370 // AT1G43190 // AT2G25880 // AT5G10480 // AT4G16970 // AT2G27970 // AT5G11510 // AT3G48750 // AT1G47870 // AT4G04670 // AT3G50070 // AT2G35630 // AT3G50630 // AT5G62020 // AT1G79280 // AT2G26760 // AT4G22910 // AT3G01…
GO:0007346	P	regulation of mitotic cell cycle	16	70	109	28397	1.4e-23	7.3e-22	// AT5G43080 // AT1G15570 // AT4G21270 // AT1G76540 // AT5G48600 // AT1G44110 // AT5G11510 // AT1G18040 // AT1G02970 // AT4G34160 // AT5G48820 // AT3G11520 // AT3G60840 // AT1G20930 // AT1G47210 // AT1G80370
GO:0032501	P	multicellular organismal process	46	70	4020	28397	1e-22	5.2e-21	// AT1G15570 // AT5G48600 // AT3G49240 // AT1G44110 // AT1G73690 // AT3G50070 // AT2G45490 // AT1G20930 // AT1G16330 // AT5G45550 // AT4G02070 // AT5G65420 // AT3G55000 // AT5G67260 // AT1G76540 // AT3G07160 // AT2G28450 // AT5G10480 // AT3G11520 // AT1G54440 // AT1G80370 // AT4G22910 // AT2G25880 // AT5G37630 // AT1G02970 // AT2G27970 // AT1G47870 // AT3G48750 // AT5G11510 // AT5G18820 // AT2G35…
GO:0007017	P	microtubule-based process	20	70	313	28397	1.2e-22	6e-21	// AT3G55000 // AT2G46560 // AT4G21270 // AT1G76540 // AT2G01910 // AT5G11510 // AT1G15570 // AT1G18040 // AT1G02970 // AT4G34160 // AT5G48820 // AT2G45490 // AT3G60840 // AT1G20930 // AT1G77720 // AT2G35630 // AT3G11520 // AT1G79280 // AT5G13840 // AT4G37490
GO:0050794	P	regulation of cellular process	48	70	4595	28397	2.5e-22	1.2e-20	// AT1G15570 // AT5G48600 // AT3G49240 // AT1G44110 // AT1G73690 // AT1G02970 // AT2G45490 // AT1G20930 // AT1G16330 // AT4G02070 // AT5G65420 // AT5G43080 // AT5G67260 // AT1G76540 // AT3G07160 // AT3G11520 // AT1G80370 // AT1G43190 // AT2G25880 // AT5G10480 // AT4G16970 // AT2G27970 // AT1G47870 // AT3G48750 // AT5G11510 // AT4G21270 // AT4G04670 // AT3G50070 // AT2G35630 // AT3G50630 // AT5G62…
GO:0050790	P	regulation of catalytic activity	20	70	332	28397	3.8e-22	1.7e-20	// AT5G43080 // AT1G15570 // AT1G76540 // AT4G19600 // AT3G50070 // AT1G47210 // AT3G50630 // AT1G44110 // AT1G73690 // AT1G18040 // AT5G27620 // AT5G48820 // AT3G11520 // AT5G27970 // AT2G27970 // AT1G80370 // AT4G37490 // AT3G48750 // AT2G26760 // AT5G65420
GO:0000280	P	nuclear division	15	70	107	28397	7.3e-22	3.3e-20	// AT5G37630 // AT1G15570 // AT1G76540 // AT5G48600 // AT3G07160 // AT5G11510 // AT1G18040 // AT1G02970 // AT4G34160 // AT5G48820 // AT3G11520 // AT3G60840 // AT1G20930 // AT2G35630 // AT4G37490
GO:0016043	P	cellular component organization	41	70	3141	28397	1.1e-21	4.9e-20	// AT1G15570 // AT5G23250 // AT5G48600 // AT5G10480 // AT2G01910 // AT1G02970 // AT2G45490 // AT1G04730 // AT5G45550 // AT4G02070 // AT4G22910 // AT3G55000 // AT4G21270 // AT1G76540 // AT3G07160 // AT5G48820 // AT2G28450 // AT3G11520 // AT1G80370 // AT1G44110 // AT5G37630 // AT2G46560 // AT1G47870 // AT1G77720 // AT5G11510 // AT4G04670 // AT2G35630 // AT1G79280 // AT5G04040 // AT4G19600 // AT5G24…
GO:0006139	P	nucleobase, nucleoside, nucleotide and nucleic acid metabolic process	48	70	4798	28397	1.6e-21	6.9e-20	// AT1G15570 // AT5G23250 // AT4G24830 // AT3G49240 // AT1G44110 // AT1G73690 // AT3G50070 // AT2G45490 // AT1G04730 // AT4G02070 // AT5G65420 // AT3G55000 // AT5G43080 // AT4G21270 // AT1G76540 // AT5G48600 // AT5G48820 // AT2G28450 // AT3G11520 // AT1G54440 // AT1G80370 // AT4G22910 // AT4G38890 // AT1G02970 // AT2G27970 // AT1G47870 // AT3G48750 // AT1G77720 // AT5G11510 // AT5G18820 // AT4G04…
GO:0006807	P	nitrogen compound metabolic process	51	70	5675	28397	2.5e-21	1e-19	// AT1G15570 // AT5G23250 // AT4G24830 // AT3G49240 // AT1G44110 // AT1G73690 // AT3G50070 // AT4G11570 // AT2G45490 // AT1G04730 // AT4G02070 // AT5G65420 // AT3G55000 // AT5G43080 // AT4G21270 // AT1G76540 // AT5G48600 // AT1G77670 // AT2G28450 // AT3G11520 // AT1G54440 // AT1G80370 // AT4G22910 // AT4G38890 // AT5G10480 // AT1G02970 // AT2G27970 // AT1G47870 // AT3G48750 // AT1G77720 // AT5G11…
GO:0032502	P	developmental process	45	70	4094	28397	2.4e-21	1e-19	// AT1G15570 // AT5G48600 // AT3G49240 // AT1G44110 // AT1G73690 // AT3G50070 // AT2G45490 // AT1G20930 // AT1G16330 // AT5G45550 // AT4G02070 // AT5G65420 // AT3G55000 // AT5G67260 // AT1G76540 // AT3G07160 // AT2G28450 // AT5G10480 // AT3G11520 // AT1G54440 // AT1G80370 // AT4G22910 // AT2G25880 // AT5G37630 // AT1G02970 // AT2G27970 // AT1G47870 // AT3G48750 // AT5G11510 // AT5G18820 // AT3G50…
GO:0007275	P	multicellular organismal development	44	70	3864	28397	2.5e-21	1e-19	// AT1G15570 // AT5G48600 // AT3G49240 // AT1G44110 // AT1G73690 // AT3G50070 // AT2G45490 // AT1G20930 // AT1G16330 // AT5G45550 // AT4G02070 // AT5G65420 // AT3G55000 // AT5G67260 // AT1G76540 // AT3G07160 // AT2G28450 // AT5G10480 // AT3G11520 // AT1G54440 // AT1G80370 // AT4G22910 // AT2G25880 // AT5G37630 // AT1G02970 // AT2G27970 // AT1G47870 // AT3G48750 // AT5G11510 // AT5G18820 // AT3G50…
GO:0065009	P	regulation of molecular function	20	70	378	28397	4.3e-21	1.7e-19	// AT5G43080 // AT1G15570 // AT1G76540 // AT4G19600 // AT3G50070 // AT1G47210 // AT3G50630 // AT1G44110 // AT1G73690 // AT1G18040 // AT5G27620 // AT5G48820 // AT3G11520 // AT5G27970 // AT2G27970 // AT1G80370 // AT4G37490 // AT3G48750 // AT2G26760 // AT5G65420
GO:0045736	P	negative regulation of cyclin-dependent protein kinase activity	11	70	27	28397	9.9e-21	3.7e-19	// AT1G15570 // AT2G27970 // AT3G50070 // AT3G48750 // AT1G73690 // AT1G18040 // AT5G27620 // AT5G48820 // AT1G76540 // AT3G50630 // AT5G65420
GO:0051225	P	spindle assembly	12	70	45	28397	1.2e-20	4.3e-19	// AT1G15570 // AT4G21270 // AT1G76540 // AT5G11510 // AT1G18040 // AT1G02970 // AT4G34160 // AT5G48820 // AT3G11520 // AT3G60840 // AT1G20930 // AT5G13840
GO:0048869	P	cellular developmental process	30	70	1453	28397	1.8e-20	6.3e-19	// AT1G15570 // AT3G49240 // AT1G73690 // AT1G16330 // AT5G45550 // AT5G65420 // AT3G55000 // AT5G67260 // AT1G76540 // AT3G07160 // AT2G28450 // AT3G11520 // AT1G80370 // AT4G22910 // AT5G10480 // AT3G50070 // AT2G27970 // AT3G48750 // AT1G47870 // AT3G50630 // AT2G26760 // AT4G19600 // AT5G24350 // AT2G04660 // AT2G36010 // AT1G18040 // AT5G27620 // AT5G48820 // AT5G13840 // AT4G37490
GO:0007051	P	spindle organization	12	70	48	28397	2.3e-20	8.2e-19	// AT1G15570 // AT4G21270 // AT1G76540 // AT5G11510 // AT1G18040 // AT1G02970 // AT4G34160 // AT5G48820 // AT3G11520 // AT3G60840 // AT1G20930 // AT5G13840
GO:0048285	P	organelle fission	15	70	139	28397	2.8e-20	9.6e-19	// AT5G37630 // AT1G15570 // AT1G76540 // AT5G48600 // AT3G07160 // AT5G11510 // AT1G18040 // AT1G02970 // AT4G34160 // AT5G48820 // AT3G11520 // AT3G60840 // AT1G20930 // AT2G35630 // AT4G37490
GO:0045786	P	negative regulation of cell cycle	11	70	32	28397	4.7e-20	1.6e-18	// AT1G15570 // AT2G27970 // AT3G50070 // AT3G48750 // AT1G73690 // AT1G18040 // AT5G27620 // AT5G48820 // AT1G76540 // AT3G50630 // AT5G65420
GO:0007010	P	cytoskeleton organization	21	70	507	28397	4.8e-20	1.6e-18	// AT3G55000 // AT2G46560 // AT4G21270 // AT1G76540 // AT5G24350 // AT2G01910 // AT5G11510 // AT1G15570 // AT1G18040 // AT1G02970 // AT4G34160 // AT5G48820 // AT2G45490 // AT3G60840 // AT1G20930 // AT1G77720 // AT2G35630 // AT3G11520 // AT1G79280 // AT5G13840 // AT4G37490
GO:0048523	P	negative regulation of cellular process	24	70	789	28397	6.3e-20	2.1e-18	// AT1G15570 // AT5G48600 // AT2G25880 // AT1G73690 // AT3G50070 // AT2G45490 // AT4G02070 // AT5G65420 // AT4G21270 // AT1G76540 // AT3G11520 // AT1G79280 // AT5G10480 // AT1G02970 // AT2G27970 // AT3G48750 // AT1G47870 // AT2G35630 // AT1G18040 // AT5G27620 // AT5G48820 // AT1G77720 // AT5G13840 // AT3G50630
GO:0050789	P	regulation of biological process	48	70	5235	28397	7e-20	2.3e-18	// AT1G15570 // AT5G48600 // AT3G49240 // AT1G44110 // AT1G73690 // AT1G02970 // AT2G45490 // AT1G20930 // AT1G16330 // AT4G02070 // AT5G65420 // AT5G43080 // AT5G67260 // AT1G76540 // AT3G07160 // AT3G11520 // AT1G80370 // AT1G43190 // AT2G25880 // AT5G10480 // AT4G16970 // AT2G27970 // AT1G47870 // AT3G48750 // AT5G11510 // AT4G21270 // AT4G04670 // AT3G50070 // AT2G35630 // AT3G50630 // AT5G62…
GO:0070925	P	organelle assembly	12	70	57	28397	1.4e-19	4.5e-18	// AT1G15570 // AT4G21270 // AT1G76540 // AT5G11510 // AT1G18040 // AT1G02970 // AT4G34160 // AT5G48820 // AT3G11520 // AT3G60840 // AT1G20930 // AT5G13840
GO:0006996	P	organelle organization	33	70	2044	28397	1.7e-19	5.1e-18	// AT1G15570 // AT5G23250 // AT5G48600 // AT2G01910 // AT1G02970 // AT2G45490 // AT1G04730 // AT5G45550 // AT4G02070 // AT3G55000 // AT4G21270 // AT1G76540 // AT3G07160 // AT5G48820 // AT2G28450 // AT3G11520 // AT1G79280 // AT1G44110 // AT5G37630 // AT2G46560 // AT5G11510 // AT5G04040 // AT4G04670 // AT2G35630 // AT5G24350 // AT1G20930 // AT1G18040 // AT4G34160 // AT2G25880 // AT3G60840 // AT1G77…
GO:0065007	P	biological regulation	51	70	6222	28397	1.7e-19	5.3e-18	// AT1G15570 // AT5G48600 // AT3G49240 // AT1G44110 // AT1G73690 // AT1G02970 // AT2G45490 // AT1G20930 // AT1G16330 // AT5G45550 // AT4G02070 // AT5G65420 // AT5G43080 // AT5G67260 // AT1G76540 // AT3G07160 // AT3G11520 // AT1G54440 // AT1G80370 // AT1G43190 // AT2G25880 // AT5G10480 // AT4G16970 // AT2G27970 // AT1G47870 // AT3G48750 // AT1G77720 // AT5G11510 // AT4G21270 // AT4G04670 // AT3G50…
GO:0048856	P	anatomical structure development	40	70	3396	28397	2e-19	6.1e-18	// AT1G15570 // AT5G48600 // AT3G49240 // AT1G44110 // AT1G73690 // AT1G20930 // AT1G16330 // AT5G45550 // AT4G02070 // AT5G65420 // AT5G67260 // AT1G76540 // AT3G07160 // AT5G10480 // AT3G11520 // AT1G80370 // AT4G22910 // AT2G25880 // AT5G37630 // AT3G50070 // AT2G27970 // AT5G11510 // AT3G48750 // AT1G47870 // AT5G18820 // AT3G50630 // AT1G79280 // AT2G26760 // AT4G19600 // AT5G24350 // AT2G04…
GO:0033673	P	negative regulation of kinase activity	11	70	43	28397	7.7e-19	2.2e-17	// AT1G15570 // AT2G27970 // AT3G50070 // AT3G48750 // AT1G73690 // AT1G18040 // AT5G27620 // AT5G48820 // AT1G76540 // AT3G50630 // AT5G65420
GO:0051348	P	negative regulation of transferase activity	11	70	43	28397	7.7e-19	2.2e-17	// AT1G15570 // AT2G27970 // AT3G50070 // AT3G48750 // AT1G73690 // AT1G18040 // AT5G27620 // AT5G48820 // AT1G76540 // AT3G50630 // AT5G65420
GO:0006469	P	negative regulation of protein kinase activity	11	70	43	28397	7.7e-19	2.2e-17	// AT1G15570 // AT2G27970 // AT3G50070 // AT3G48750 // AT1G73690 // AT1G18040 // AT5G27620 // AT5G48820 // AT1G76540 // AT3G50630 // AT5G65420
GO:0048519	P	negative regulation of biological process	26	70	1243	28397	9.9e-18	2.8e-16	// AT1G15570 // AT5G48600 // AT1G44110 // AT1G73690 // AT3G50070 // AT2G45490 // AT4G02070 // AT5G65420 // AT4G21270 // AT1G76540 // AT3G11520 // AT1G79280 // AT2G25880 // AT5G10480 // AT1G02970 // AT2G27970 // AT3G48750 // AT1G47870 // AT2G35630 // AT2G04660 // AT1G18040 // AT5G27620 // AT5G48820 // AT1G77720 // AT5G13840 // AT3G50630
GO:0008283	P	cell proliferation	16	70	269	28397	1e-17	2.8e-16	// AT1G15570 // AT5G67260 // AT1G76540 // AT4G19600 // AT5G48600 // AT2G36010 // AT1G44110 // AT1G02970 // AT4G34160 // AT2G25880 // AT1G20930 // AT3G50070 // AT5G13840 // AT1G80370 // AT4G37490 // AT3G48750
GO:0009791	P	post-embryonic development	32	70	2188	28397	1.3e-17	3.5e-16	// AT1G15570 // AT5G48600 // AT3G49240 // AT1G44110 // AT1G73690 // AT2G45490 // AT1G16330 // AT4G02070 // AT5G65420 // AT5G67260 // AT1G76540 // AT3G11520 // AT1G54440 // AT1G79280 // AT2G25880 // AT5G37630 // AT3G50070 // AT2G27970 // AT3G48750 // AT5G11510 // AT5G18820 // AT1G80370 // AT2G26760 // AT5G24350 // AT3G50630 // AT1G18040 // AT5G27620 // AT4G34160 // AT5G48820 // AT1G77720 // AT4G37…
GO:0016310	P	phosphorylation	26	70	1354	28397	7.6e-17	2e-15	// AT1G15570 // AT1G44110 // AT1G73690 // AT3G50070 // AT2G45490 // AT1G20930 // AT5G65420 // AT5G43080 // AT1G76540 // AT3G11520 // AT1G80370 // AT2G25880 // AT5G10480 // AT4G16970 // AT2G27970 // AT3G48750 // AT2G35630 // AT2G26760 // AT1G47210 // AT4G19600 // AT3G50630 // AT1G18040 // AT5G27620 // AT5G48820 // AT1G77720 // AT4G37490
GO:0060255	P	regulation of macromolecule metabolic process	34	70	2829	28397	2.9e-16	7.5e-15	// AT1G15570 // AT5G48600 // AT1G44110 // AT1G02970 // AT2G45490 // AT1G20930 // AT4G02070 // AT4G22910 // AT4G21270 // AT1G76540 // AT3G11520 // AT1G79280 // AT3G01330 // AT2G25880 // AT5G10480 // AT4G16970 // AT5G11510 // AT1G47870 // AT4G04670 // AT2G35630 // AT5G62020 // AT1G80370 // AT1G43190 // AT4G19600 // AT2G04660 // AT2G36010 // AT1G18040 // AT5G27620 // AT4G34160 // AT5G48820 // AT3G60…
GO:0080090	P	regulation of primary metabolic process	33	70	2761	28397	1.2e-15	3e-14	// AT1G15570 // AT5G48600 // AT1G44110 // AT1G02970 // AT2G45490 // AT1G20930 // AT4G02070 // AT4G22910 // AT4G21270 // AT1G76540 // AT3G11520 // AT1G79280 // AT3G01330 // AT2G25880 // AT5G10480 // AT4G16970 // AT5G11510 // AT1G47870 // AT4G04670 // AT2G35630 // AT5G62020 // AT1G80370 // AT1G43190 // AT4G19600 // AT2G04660 // AT2G36010 // AT1G18040 // AT5G27620 // AT4G34160 // AT5G48820 // AT3G60…
GO:0009987	P	cellular process	66	70	14419	28397	2.3e-15	5.8e-14	// AT1G15570 // AT5G23250 // AT5G48600 // AT3G49240 // AT2G01910 // AT1G73690 // AT4G16970 // AT4G11570 // AT3G50630 // AT2G45490 // AT4G04670 // AT1G04730 // AT1G16330 // AT5G45550 // AT4G02070 // AT5G65420 // AT3G55000 // AT5G43080 // AT2G25740 // AT5G67260 // AT1G76540 // AT4G24830 // AT3G07160 // AT1G77670 // AT2G28450 // AT5G10480 // AT3G11520 // AT1G54440 // AT1G80370 // AT4G22910 // AT4G38…
GO:0006796	P	phosphate metabolic process	26	70	1571	28397	2.5e-15	6.2e-14	// AT1G15570 // AT1G44110 // AT1G73690 // AT3G50070 // AT2G45490 // AT1G20930 // AT5G65420 // AT5G43080 // AT1G76540 // AT3G11520 // AT1G80370 // AT2G25880 // AT5G10480 // AT4G16970 // AT2G27970 // AT3G48750 // AT2G35630 // AT2G26760 // AT1G47210 // AT4G19600 // AT3G50630 // AT1G18040 // AT5G27620 // AT5G48820 // AT1G77720 // AT4G37490
GO:0006793	P	phosphorus metabolic process	26	70	1572	28397	2.5e-15	6.2e-14	// AT1G15570 // AT1G44110 // AT1G73690 // AT3G50070 // AT2G45490 // AT1G20930 // AT5G65420 // AT5G43080 // AT1G76540 // AT3G11520 // AT1G80370 // AT2G25880 // AT5G10480 // AT4G16970 // AT2G27970 // AT3G48750 // AT2G35630 // AT2G26760 // AT1G47210 // AT4G19600 // AT3G50630 // AT1G18040 // AT5G27620 // AT5G48820 // AT1G77720 // AT4G37490
GO:0043086	P	negative regulation of catalytic activity	11	70	112	28397	1.1e-14	2.6e-13	// AT1G15570 // AT2G27970 // AT3G50070 // AT3G48750 // AT1G73690 // AT1G18040 // AT5G27620 // AT5G48820 // AT1G76540 // AT3G50630 // AT5G65420
GO:0044092	P	negative regulation of molecular function	11	70	122	28397	2.6e-14	6.3e-13	// AT1G15570 // AT2G27970 // AT3G50070 // AT3G48750 // AT1G73690 // AT1G18040 // AT5G27620 // AT5G48820 // AT1G76540 // AT3G50630 // AT5G65420
GO:0009059	P	macromolecule biosynthetic process	42	70	5312	28397	2.9e-14	6.9e-13	// AT1G15570 // AT1G20930 // AT5G48600 // AT1G44110 // AT1G73690 // AT1G02970 // AT2G45490 // AT1G04730 // AT4G02070 // AT5G65420 // AT4G21270 // AT1G76540 // AT3G07160 // AT3G11520 // AT1G80370 // AT1G43190 // AT2G25880 // AT5G10480 // AT4G16970 // AT2G27970 // AT5G11510 // AT3G48750 // AT1G77720 // AT1G47870 // AT2G35630 // AT3G50630 // AT5G62020 // AT4G22910 // AT3G01330 // AT3G50070 // AT4G19…
GO:0010556	P	regulation of macromolecule biosynthetic process	30	70	2491	28397	3.6e-14	8.4e-13	// AT1G15570 // AT5G48600 // AT1G44110 // AT1G02970 // AT2G45490 // AT1G20930 // AT4G02070 // AT4G22910 // AT4G21270 // AT1G76540 // AT3G11520 // AT1G80370 // AT3G01330 // AT2G25880 // AT4G16970 // AT5G11510 // AT1G47870 // AT2G35630 // AT5G62020 // AT1G43190 // AT4G19600 // AT2G04660 // AT2G36010 // AT1G18040 // AT5G27620 // AT4G34160 // AT5G48820 // AT3G60840 // AT1G77720 // AT5G13840
GO:0019219	P	regulation of nucleobase, nucleoside, nucleotide and nucleic acid metabolic process	30	70	2496	28397	3.8e-14	8.7e-13	// AT1G15570 // AT5G48600 // AT1G44110 // AT2G45490 // AT1G20930 // AT4G02070 // AT4G22910 // AT4G21270 // AT1G76540 // AT3G11520 // AT1G80370 // AT3G01330 // AT2G25880 // AT1G02970 // AT5G11510 // AT1G47870 // AT4G04670 // AT2G35630 // AT5G62020 // AT1G43190 // AT4G19600 // AT2G04660 // AT2G36010 // AT1G18040 // AT5G27620 // AT4G34160 // AT5G48820 // AT3G60840 // AT1G77720 // AT5G13840
GO:0051567	P	histone H3-K9 methylation	12	70	180	28397	4.7e-14	1.1e-12	// AT1G02970 // AT4G21270 // AT1G76540 // AT5G48600 // AT1G44110 // AT5G13840 // AT2G45490 // AT1G77720 // AT2G35630 // AT3G11520 // AT4G37490 // AT2G25880
GO:0051171	P	regulation of nitrogen compound metabolic process	30	70	2517	28397	4.7e-14	1.1e-12	// AT1G15570 // AT5G48600 // AT1G44110 // AT2G45490 // AT1G20930 // AT4G02070 // AT4G22910 // AT4G21270 // AT1G76540 // AT3G11520 // AT1G80370 // AT3G01330 // AT2G25880 // AT1G02970 // AT5G11510 // AT1G47870 // AT4G04670 // AT2G35630 // AT5G62020 // AT1G43190 // AT4G19600 // AT2G04660 // AT2G36010 // AT1G18040 // AT5G27620 // AT4G34160 // AT5G48820 // AT3G60840 // AT1G77720 // AT5G13840
GO:0034645	P	cellular macromolecule biosynthetic process	41	70	5243	28397	1.2e-13	2.6e-12	// AT1G15570 // AT1G20930 // AT5G48600 // AT1G44110 // AT1G73690 // AT1G02970 // AT2G45490 // AT1G04730 // AT4G02070 // AT5G65420 // AT4G21270 // AT1G76540 // AT3G07160 // AT3G11520 // AT1G80370 // AT1G43190 // AT2G25880 // AT4G16970 // AT2G27970 // AT5G11510 // AT3G48750 // AT1G77720 // AT1G47870 // AT2G35630 // AT3G50630 // AT5G62020 // AT4G22910 // AT3G01330 // AT3G50070 // AT4G19600 // AT5G24…
GO:0031326	P	regulation of cellular biosynthetic process	30	70	2631	28397	1.5e-13	3.3e-12	// AT1G15570 // AT5G48600 // AT1G44110 // AT1G02970 // AT2G45490 // AT1G20930 // AT4G02070 // AT4G22910 // AT4G21270 // AT1G76540 // AT3G11520 // AT1G80370 // AT3G01330 // AT2G25880 // AT4G16970 // AT5G11510 // AT1G47870 // AT2G35630 // AT5G62020 // AT1G43190 // AT4G19600 // AT2G04660 // AT2G36010 // AT1G18040 // AT5G27620 // AT4G34160 // AT5G48820 // AT3G60840 // AT1G77720 // AT5G13840
GO:0009889	P	regulation of biosynthetic process	30	70	2634	28397	1.5e-13	3.3e-12	// AT1G15570 // AT5G48600 // AT1G44110 // AT1G02970 // AT2G45490 // AT1G20930 // AT4G02070 // AT4G22910 // AT4G21270 // AT1G76540 // AT3G11520 // AT1G80370 // AT3G01330 // AT2G25880 // AT4G16970 // AT5G11510 // AT1G47870 // AT2G35630 // AT5G62020 // AT1G43190 // AT4G19600 // AT2G04660 // AT2G36010 // AT1G18040 // AT5G27620 // AT4G34160 // AT5G48820 // AT3G60840 // AT1G77720 // AT5G13840
GO:0051276	P	chromosome organization	18	70	752	28397	3.1e-13	6.6e-12	// AT5G37630 // AT1G02970 // AT4G21270 // AT1G76540 // AT4G04670 // AT5G48600 // AT1G44110 // AT5G24350 // AT5G13840 // AT5G48820 // AT2G45490 // AT1G04730 // AT1G77720 // AT2G35630 // AT3G11520 // AT4G02070 // AT4G37490 // AT2G25880
GO:0044260	P	cellular macromolecule metabolic process	51	70	8616	28397	3.2e-13	6.8e-12	// AT1G15570 // AT1G20930 // AT5G48600 // AT3G49240 // AT1G44110 // AT1G73690 // AT1G02970 // AT2G45490 // AT1G04730 // AT4G02070 // AT5G65420 // AT3G55000 // AT5G43080 // AT4G21270 // AT1G76540 // AT3G07160 // AT5G48820 // AT2G28450 // AT3G11520 // AT1G80370 // AT1G43190 // AT4G38890 // AT5G10480 // AT4G16970 // AT2G27970 // AT1G47870 // AT3G48750 // AT1G77720 // AT5G11510 // AT5G18820 // AT4G04…
GO:0044237	P	cellular metabolic process	58	70	11509	28397	4.6e-13	9.6e-12	// AT1G15570 // AT5G23250 // AT4G24830 // AT3G49240 // AT1G44110 // AT1G73690 // AT1G02970 // AT4G11570 // AT3G50630 // AT2G45490 // AT1G04730 // AT4G02070 // AT5G65420 // AT3G55000 // AT5G43080 // AT4G21270 // AT1G76540 // AT5G48600 // AT3G07160 // AT1G77670 // AT2G28450 // AT3G11520 // AT1G54440 // AT1G80370 // AT4G22910 // AT4G38890 // AT5G10480 // AT4G16970 // AT2G27970 // AT1G47870 // AT3G48…
GO:0044249	P	cellular biosynthetic process	48	70	7737	28397	8e-13	1.6e-11	// AT1G15570 // AT5G23250 // AT4G24830 // AT3G49240 // AT1G44110 // AT1G73690 // AT1G02970 // AT2G45490 // AT1G04730 // AT4G02070 // AT5G65420 // AT4G21270 // AT1G76540 // AT5G48600 // AT3G07160 // AT1G77670 // AT2G28450 // AT3G11520 // AT1G80370 // AT1G43190 // AT2G25880 // AT5G10480 // AT4G16970 // AT2G27970 // AT1G47870 // AT3G48750 // AT1G77720 // AT5G11510 // AT5G18820 // AT2G35630 // AT3G50…
GO:0034968	P	histone lysine methylation	12	70	243	28397	1.4e-12	2.8e-11	// AT1G02970 // AT4G21270 // AT1G76540 // AT5G48600 // AT1G44110 // AT5G13840 // AT2G45490 // AT1G77720 // AT2G35630 // AT3G11520 // AT4G37490 // AT2G25880
GO:0050793	P	regulation of developmental process	18	70	844	28397	2e-12	4.1e-11	// AT5G10480 // AT1G15570 // AT4G21270 // AT1G76540 // AT5G48600 // AT3G49240 // AT3G07160 // AT1G44110 // AT2G04660 // AT4G34160 // AT2G25880 // AT3G11520 // AT1G20930 // AT1G77720 // AT5G13840 // AT1G80370 // AT1G79280 // AT4G22910
GO:0009058	P	biosynthetic process	48	70	7962	28397	2.5e-12	5e-11	// AT1G15570 // AT5G23250 // AT4G24830 // AT3G49240 // AT1G44110 // AT1G73690 // AT1G02970 // AT2G45490 // AT1G04730 // AT4G02070 // AT5G65420 // AT4G21270 // AT1G76540 // AT5G48600 // AT3G07160 // AT1G77670 // AT2G28450 // AT3G11520 // AT1G80370 // AT1G43190 // AT2G25880 // AT5G10480 // AT4G16970 // AT2G27970 // AT1G47870 // AT3G48750 // AT1G77720 // AT5G11510 // AT5G18820 // AT2G35630 // AT3G50…
GO:0010605	P	negative regulation of macromolecule metabolic process	16	70	636	28397	3.8e-12	7.4e-11	// AT5G10480 // AT1G02970 // AT4G21270 // AT1G76540 // AT5G48600 // AT2G04660 // AT1G44110 // AT5G48820 // AT5G13840 // AT2G25880 // AT3G11520 // AT2G45490 // AT1G77720 // AT2G35630 // AT4G02070 // AT1G79280
GO:0031324	P	negative regulation of cellular metabolic process	14	70	449	28397	6.3e-12	1.2e-10	// AT5G10480 // AT1G02970 // AT4G21270 // AT1G76540 // AT5G48600 // AT2G25880 // AT5G13840 // AT5G48820 // AT3G11520 // AT2G45490 // AT1G77720 // AT2G35630 // AT4G02070 // AT1G79280
GO:0009892	P	negative regulation of metabolic process	16	70	659	28397	6.3e-12	1.2e-10	// AT5G10480 // AT1G02970 // AT4G21270 // AT1G76540 // AT5G48600 // AT2G04660 // AT1G44110 // AT5G48820 // AT5G13840 // AT2G25880 // AT3G11520 // AT2G45490 // AT1G77720 // AT2G35630 // AT4G02070 // AT1G79280
GO:0043170	P	macromolecule metabolic process	51	70	9246	28397	6.5e-12	1.2e-10	// AT1G15570 // AT1G20930 // AT5G48600 // AT3G49240 // AT1G44110 // AT1G73690 // AT1G02970 // AT2G45490 // AT1G04730 // AT4G02070 // AT5G65420 // AT3G55000 // AT5G43080 // AT4G21270 // AT1G76540 // AT3G07160 // AT5G48820 // AT2G28450 // AT3G11520 // AT1G80370 // AT1G43190 // AT4G38890 // AT5G10480 // AT4G16970 // AT2G27970 // AT1G47870 // AT3G48750 // AT1G77720 // AT5G11510 // AT5G18820 // AT4G04…
GO:0016571	P	histone methylation	12	70	296	28397	1.3e-11	2.4e-10	// AT1G02970 // AT4G21270 // AT1G76540 // AT5G48600 // AT1G44110 // AT5G13840 // AT2G45490 // AT1G77720 // AT2G35630 // AT3G11520 // AT4G37490 // AT2G25880
GO:0006479	P	protein amino acid methylation	12	70	305	28397	1.8e-11	3.3e-10	// AT1G02970 // AT4G21270 // AT1G76540 // AT5G48600 // AT1G44110 // AT5G13840 // AT2G45490 // AT1G77720 // AT2G35630 // AT3G11520 // AT4G37490 // AT2G25880
GO:0008213	P	protein amino acid alkylation	12	70	305	28397	1.8e-11	3.3e-10	// AT1G02970 // AT4G21270 // AT1G76540 // AT5G48600 // AT1G44110 // AT5G13840 // AT2G45490 // AT1G77720 // AT2G35630 // AT3G11520 // AT4G37490 // AT2G25880
GO:0009653	P	anatomical structure morphogenesis	23	70	1783	28397	2.4e-11	4.5e-10	// AT1G15570 // AT5G48600 // AT3G49240 // AT1G44110 // AT1G20930 // AT5G45550 // AT4G02070 // AT4G22910 // AT4G21270 // AT1G76540 // AT3G07160 // AT1G80370 // AT2G25880 // AT5G10480 // AT5G11510 // AT1G47870 // AT4G19600 // AT5G24350 // AT2G04660 // AT2G36010 // AT4G34160 // AT1G77720 // AT5G13840
GO:0040029	P	regulation of gene expression, epigenetic	14	70	508	28397	3.1e-11	5.6e-10	// AT1G02970 // AT4G21270 // AT1G76540 // AT5G48600 // AT2G04660 // AT1G44110 // AT5G13840 // AT5G48820 // AT2G45490 // AT1G77720 // AT2G35630 // AT3G11520 // AT4G37490 // AT2G25880
GO:0016569	P	covalent chromatin modification	13	70	419	28397	4.1e-11	7.3e-10	// AT1G02970 // AT4G21270 // AT1G76540 // AT5G48600 // AT1G44110 // AT5G13840 // AT5G48820 // AT2G45490 // AT1G77720 // AT2G35630 // AT3G11520 // AT4G37490 // AT2G25880
GO:0044238	P	primary metabolic process	56	70	11717	28397	4.2e-11	7.5e-10	// AT1G15570 // AT5G23250 // AT4G24830 // AT3G49240 // AT1G44110 // AT1G73690 // AT1G02970 // AT2G45490 // AT1G04730 // AT4G02070 // AT5G65420 // AT3G55000 // AT5G43080 // AT4G21270 // AT1G76540 // AT5G48600 // AT3G07160 // AT1G77670 // AT2G28450 // AT3G11520 // AT1G13170 // AT1G54440 // AT1G80370 // AT4G22910 // AT4G38890 // AT5G10480 // AT4G16970 // AT2G27970 // AT1G47870 // AT3G48750 // AT1G77…
GO:0016568	P	chromatin modification	13	70	447	28397	8.9e-11	1.6e-09	// AT1G02970 // AT4G21270 // AT1G76540 // AT5G48600 // AT1G44110 // AT5G13840 // AT5G48820 // AT2G45490 // AT1G77720 // AT2G35630 // AT3G11520 // AT4G37490 // AT2G25880
GO:0016458	P	gene silencing	13	70	450	28397	9.6e-11	1.7e-09	// AT1G02970 // AT4G21270 // AT1G76540 // AT5G48600 // AT2G04660 // AT1G44110 // AT5G13840 // AT5G48820 // AT3G11520 // AT2G45490 // AT1G77720 // AT2G35630 // AT2G25880
GO:0016570	P	histone modification	12	70	371	28397	1.6e-10	2.7e-09	// AT1G02970 // AT4G21270 // AT1G76540 // AT5G48600 // AT1G44110 // AT5G13840 // AT2G45490 // AT1G77720 // AT2G35630 // AT3G11520 // AT4G37490 // AT2G25880
GO:0022607	P	cellular component assembly	16	70	832	28397	1.8e-10	3.1e-09	// AT3G55000 // AT1G15570 // AT4G21270 // AT1G76540 // AT5G11510 // AT1G18040 // AT1G02970 // AT4G34160 // AT5G48820 // AT3G11520 // AT3G60840 // AT1G20930 // AT5G13840 // AT2G35630 // AT1G80370 // AT4G22910
GO:0008152	P	metabolic process	59	70	13633	28397	3.2e-10	5.4e-09	// AT1G15570 // AT5G23250 // AT4G24830 // AT3G49240 // AT1G44110 // AT1G73690 // AT1G02970 // AT4G11570 // AT3G50630 // AT2G45490 // AT1G04730 // AT4G02070 // AT5G65420 // AT3G55000 // AT5G43080 // AT4G21270 // AT1G76540 // AT5G48600 // AT3G07160 // AT1G77670 // AT2G28450 // AT3G11520 // AT1G13170 // AT1G54440 // AT1G80370 // AT4G22910 // AT4G38890 // AT5G10480 // AT4G16970 // AT2G27970 // AT1G47…
GO:0045934	P	negative regulation of nucleobase, nucleoside, nucleotide and nucleic acid metabolic process	12	70	413	28397	5.1e-10	8.5e-09	// AT1G02970 // AT4G21270 // AT1G76540 // AT5G48600 // AT2G25880 // AT5G13840 // AT5G48820 // AT3G11520 // AT2G45490 // AT1G77720 // AT2G35630 // AT4G02070
GO:0051172	P	negative regulation of nitrogen compound metabolic process	12	70	415	28397	5.4e-10	8.9e-09	// AT1G02970 // AT4G21270 // AT1G76540 // AT5G48600 // AT2G25880 // AT5G13840 // AT5G48820 // AT3G11520 // AT2G45490 // AT1G77720 // AT2G35630 // AT4G02070
GO:0006342	P	chromatin silencing	10	70	242	28397	6.2e-10	1e-08	// AT4G21270 // AT1G76540 // AT5G48600 // AT2G25880 // AT5G13840 // AT5G48820 // AT3G11520 // AT2G45490 // AT1G77720 // AT2G35630
GO:0045814	P	negative regulation of gene expression, epigenetic	10	70	247	28397	7.4e-10	1.2e-08	// AT4G21270 // AT1G76540 // AT5G48600 // AT2G25880 // AT5G13840 // AT5G48820 // AT3G11520 // AT2G45490 // AT1G77720 // AT2G35630
GO:0042127	P	regulation of cell proliferation	8	70	118	28397	8.8e-10	1.4e-08	// AT3G50070 // AT5G67260 // AT4G19600 // AT1G44110 // AT4G34160 // AT5G13840 // AT3G48750 // AT2G25880
GO:0006325	P	chromatin organization	13	70	566	28397	1.5e-09	2.3e-08	// AT1G02970 // AT4G21270 // AT1G76540 // AT5G48600 // AT1G44110 // AT5G13840 // AT5G48820 // AT2G45490 // AT1G77720 // AT2G35630 // AT3G11520 // AT4G37490 // AT2G25880
GO:0022603	P	regulation of anatomical structure morphogenesis	8	70	129	28397	1.7e-09	2.7e-08	// AT1G15570 // AT1G76540 // AT2G04660 // AT3G07160 // AT1G20930 // AT5G13840 // AT1G80370 // AT4G22910
GO:0051321	P	meiotic cell cycle	10	70	273	28397	1.9e-09	2.9e-08	// AT4G21270 // AT5G48600 // AT3G07160 // AT2G36010 // AT3G48750 // AT4G04670 // AT2G35630 // AT5G45550 // AT4G02070 // AT4G37490
GO:0010629	P	negative regulation of gene expression	13	70	611	28397	3.6e-09	5.6e-08	// AT1G02970 // AT4G21270 // AT1G76540 // AT5G48600 // AT2G04660 // AT1G44110 // AT5G13840 // AT5G48820 // AT3G11520 // AT2G45490 // AT1G77720 // AT2G35630 // AT2G25880
GO:0040008	P	regulation of growth	10	70	304	28397	5.1e-09	7.8e-08	// AT5G10480 // AT1G15570 // AT2G04660 // AT3G07160 // AT2G25880 // AT4G34160 // AT5G13840 // AT1G80370 // AT4G37490 // AT4G22910
GO:0010558	P	negative regulation of macromolecule biosynthetic process	11	70	418	28397	7.8e-09	1.2e-07	// AT1G02970 // AT4G21270 // AT1G76540 // AT5G48600 // AT2G25880 // AT5G13840 // AT5G48820 // AT3G11520 // AT2G45490 // AT1G77720 // AT2G35630
GO:0009890	P	negative regulation of biosynthetic process	11	70	425	28397	9.2e-09	1.4e-07	// AT1G02970 // AT4G21270 // AT1G76540 // AT5G48600 // AT2G25880 // AT5G13840 // AT5G48820 // AT3G11520 // AT2G45490 // AT1G77720 // AT2G35630
GO:0031327	P	negative regulation of cellular biosynthetic process	11	70	425	28397	9.2e-09	1.4e-07	// AT1G02970 // AT4G21270 // AT1G76540 // AT5G48600 // AT2G25880 // AT5G13840 // AT5G48820 // AT3G11520 // AT2G45490 // AT1G77720 // AT2G35630
GO:0043414	P	macromolecule methylation	12	70	540	28397	9.6e-09	1.4e-07	// AT1G02970 // AT4G21270 // AT1G76540 // AT5G48600 // AT1G44110 // AT5G13840 // AT2G45490 // AT1G77720 // AT2G35630 // AT3G11520 // AT4G37490 // AT2G25880
GO:0051302	P	regulation of cell division	6	70	56	28397	9.8e-09	1.4e-07	// AT5G10480 // AT2G04660 // AT2G36010 // AT1G47870 // AT5G13840 // AT4G22910
GO:0022414	P	reproductive process	22	70	2224	28397	1e-08	1.5e-07	// AT5G48600 // AT3G49240 // AT1G44110 // AT4G02070 // AT4G22910 // AT3G55000 // AT5G67260 // AT3G07160 // AT2G28450 // AT3G11520 // AT1G79280 // AT5G37630 // AT3G50070 // AT3G48750 // AT5G11510 // AT5G18820 // AT5G24350 // AT2G04660 // AT4G34160 // AT1G77720 // AT5G13840 // AT4G21270
GO:0032259	P	methylation	12	70	548	28397	1.1e-08	1.6e-07	// AT1G02970 // AT4G21270 // AT1G76540 // AT5G48600 // AT1G44110 // AT5G13840 // AT2G45490 // AT1G77720 // AT2G35630 // AT3G11520 // AT4G37490 // AT2G25880
GO:0000003	P	reproduction	22	70	2272	28397	1.5e-08	2.2e-07	// AT5G48600 // AT3G49240 // AT1G44110 // AT4G02070 // AT4G22910 // AT3G55000 // AT5G67260 // AT3G07160 // AT2G28450 // AT3G11520 // AT1G79280 // AT5G37630 // AT3G50070 // AT3G48750 // AT5G11510 // AT5G18820 // AT5G24350 // AT2G04660 // AT4G34160 // AT1G77720 // AT5G13840 // AT4G21270
GO:0001558	P	regulation of cell growth	7	70	112	28397	1.8e-08	2.6e-07	// AT1G15570 // AT2G04660 // AT3G07160 // AT5G13840 // AT1G80370 // AT4G37490 // AT4G22910
GO:0006730	P	one-carbon metabolic process	12	70	578	28397	2e-08	2.8e-07	// AT1G02970 // AT4G21270 // AT1G76540 // AT5G48600 // AT1G44110 // AT5G13840 // AT2G45490 // AT1G77720 // AT2G35630 // AT3G11520 // AT4G37490 // AT2G25880
GO:0048638	P	regulation of developmental growth	9	70	269	28397	2.7e-08	3.8e-07	// AT5G10480 // AT1G15570 // AT2G04660 // AT3G07160 // AT2G25880 // AT4G34160 // AT5G13840 // AT1G80370 // AT4G22910
GO:0000087	P	M phase of mitotic cell cycle	6	70	70	28397	3.4e-08	4.7e-07	// AT5G37630 // AT5G48600 // AT3G07160 // AT1G20930 // AT2G35630 // AT4G37490
GO:0016481	P	negative regulation of transcription	10	70	400	28397	6.3e-08	8.6e-07	// AT4G21270 // AT1G76540 // AT5G48600 // AT2G25880 // AT5G13840 // AT5G48820 // AT3G11520 // AT2G45490 // AT1G77720 // AT2G35630
GO:0051253	P	negative regulation of RNA metabolic process	10	70	400	28397	6.3e-08	8.6e-07	// AT4G21270 // AT1G76540 // AT5G48600 // AT2G25880 // AT5G13840 // AT5G48820 // AT3G11520 // AT2G45490 // AT1G77720 // AT2G35630
GO:0045892	P	negative regulation of transcription, DNA-dependent	10	70	400	28397	6.3e-08	8.6e-07	// AT4G21270 // AT1G76540 // AT5G48600 // AT2G25880 // AT5G13840 // AT5G48820 // AT3G11520 // AT2G45490 // AT1G77720 // AT2G35630
GO:0010468	P	regulation of gene expression	23	70	2695	28397	6.6e-08	8.9e-07	// AT5G48600 // AT1G44110 // AT1G02970 // AT2G45490 // AT4G21270 // AT1G76540 // AT3G11520 // AT3G01330 // AT2G25880 // AT4G16970 // AT5G11510 // AT1G47870 // AT2G35630 // AT5G62020 // AT1G43190 // AT4G19600 // AT2G04660 // AT2G36010 // AT5G27620 // AT5G48820 // AT1G77720 // AT5G13840 // AT4G37490
GO:0043687	P	post-translational protein modification	20	70	2075	28397	9e-08	1.2e-06	// AT5G10480 // AT4G16970 // AT4G21270 // AT1G76540 // AT5G24350 // AT5G48600 // AT3G49240 // AT1G44110 // AT1G73690 // AT1G18040 // AT1G02970 // AT5G13840 // AT2G45490 // AT1G20930 // AT1G77720 // AT2G35630 // AT3G11520 // AT1G79280 // AT4G37490 // AT2G25880
GO:0048513	P	organ development	20	70	2083	28397	9.5e-08	1.3e-06	// AT1G47870 // AT5G10480 // AT1G15570 // AT4G21270 // AT1G76540 // AT4G19600 // AT5G48600 // AT3G49240 // AT2G36010 // AT1G44110 // AT5G11510 // AT5G24350 // AT4G34160 // AT2G25880 // AT1G20930 // AT1G77720 // AT4G02070 // AT5G65420 // AT1G79280 // AT4G22910
GO:0048731	P	system development	20	70	2083	28397	9.5e-08	1.3e-06	// AT1G47870 // AT5G10480 // AT1G15570 // AT4G21270 // AT1G76540 // AT4G19600 // AT5G48600 // AT3G49240 // AT2G36010 // AT1G44110 // AT5G11510 // AT5G24350 // AT4G34160 // AT2G25880 // AT1G20930 // AT1G77720 // AT4G02070 // AT5G65420 // AT1G79280 // AT4G22910
GO:0000902	P	cell morphogenesis	12	70	691	28397	1.3e-07	1.8e-06	// AT5G10480 // AT1G15570 // AT4G19600 // AT5G24350 // AT2G04660 // AT3G07160 // AT2G36010 // AT1G47870 // AT5G13840 // AT5G45550 // AT1G80370 // AT4G22910
GO:0051239	P	regulation of multicellular organismal process	12	70	694	28397	1.4e-07	1.8e-06	// AT4G21270 // AT1G76540 // AT5G48600 // AT3G49240 // AT3G07160 // AT1G44110 // AT4G34160 // AT3G11520 // AT1G20930 // AT1G77720 // AT1G79280 // AT2G25880
GO:0051510	P	regulation of unidimensional cell growth	6	70	97	28397	2.1e-07	2.7e-06	// AT1G15570 // AT2G04660 // AT3G07160 // AT5G13840 // AT1G80370 // AT4G22910
GO:0006310	P	DNA recombination	8	70	255	28397	2.7e-07	3.5e-06	// AT3G55000 // AT5G43080 // AT1G02970 // AT5G48600 // AT4G04670 // AT2G35630 // AT4G02070 // AT4G37490
GO:0022604	P	regulation of cell morphogenesis	6	70	102	28397	2.8e-07	3.5e-06	// AT1G15570 // AT2G04660 // AT3G07160 // AT5G13840 // AT1G80370 // AT4G22910
GO:0032989	P	cellular component morphogenesis	12	70	748	28397	3.1e-07	3.9e-06	// AT5G10480 // AT1G15570 // AT4G19600 // AT5G24350 // AT2G04660 // AT3G07160 // AT2G36010 // AT1G47870 // AT5G13840 // AT5G45550 // AT1G80370 // AT4G22910
GO:0003006	P	reproductive developmental process	19	70	2050	28397	3.7e-07	4.7e-06	// AT3G55000 // AT5G37630 // AT5G18820 // AT5G67260 // AT4G21270 // AT5G24350 // AT5G48600 // AT3G49240 // AT3G07160 // AT1G44110 // AT5G11510 // AT3G50070 // AT2G28450 // AT4G34160 // AT3G11520 // AT1G77720 // AT4G02070 // AT1G79280 // AT3G48750
GO:0006306	P	DNA methylation	7	70	180	28397	4e-07	4.9e-06	// AT1G02970 // AT4G21270 // AT5G48600 // AT1G44110 // AT1G77720 // AT5G13840 // AT4G37490
GO:0006305	P	DNA alkylation	7	70	180	28397	4e-07	4.9e-06	// AT1G02970 // AT4G21270 // AT5G48600 // AT1G44110 // AT1G77720 // AT5G13840 // AT4G37490
GO:0006304	P	DNA modification	7	70	183	28397	4.4e-07	5.4e-06	// AT1G02970 // AT4G21270 // AT5G48600 // AT1G44110 // AT1G77720 // AT5G13840 // AT4G37490
GO:0051128	P	regulation of cellular component organization	8	70	278	28397	5.2e-07	6.3e-06	// AT1G15570 // AT5G24350 // AT2G04660 // AT3G07160 // AT4G04670 // AT5G13840 // AT1G80370 // AT4G22910
GO:0044085	P	cellular component biogenesis	16	70	1480	28397	5.2e-07	6.3e-06	// AT3G55000 // AT1G15570 // AT4G21270 // AT1G76540 // AT5G11510 // AT1G18040 // AT1G02970 // AT4G34160 // AT5G48820 // AT3G11520 // AT3G60840 // AT1G20930 // AT5G13840 // AT2G35630 // AT1G80370 // AT4G22910
GO:0007276	P	gamete generation	7	70	189	28397	5.5e-07	6.5e-06	// AT3G55000 // AT2G04660 // AT3G07160 // AT3G49240 // AT2G28450 // AT5G13840 // AT4G22910
GO:0016572	P	histone phosphorylation	5	70	61	28397	6.2e-07	7.3e-06	// AT2G35630 // AT1G44110 // AT2G45490 // AT1G76540 // AT2G25880
GO:0006270	P	DNA replication initiation	5	70	66	28397	8.9e-07	1.1e-05	// AT1G02970 // AT2G36010 // AT4G02070 // AT1G44110 // AT5G48600
GO:0050896	P	response to stimulus	34	70	6292	28397	1.1e-06	1.3e-05	// AT1G15570 // AT5G48600 // AT3G49240 // AT1G44110 // AT5G58003 // AT2G45490 // AT1G20930 // AT5G45550 // AT4G02070 // AT5G65420 // AT5G43080 // AT1G76540 // AT5G10480 // AT3G11520 // AT1G54440 // AT1G80370 // AT4G22910 // AT5G37630 // AT1G02970 // AT5G11510 // AT3G48750 // AT1G47870 // AT5G18820 // AT4G04670 // AT2G35630 // AT5G62020 // AT4G19600 // AT2G04660 // AT4G37490 // AT5G27620 // AT4G34…
GO:0007067	P	mitosis	5	70	69	28397	1.1e-06	1.3e-05	// AT3G07160 // AT5G37630 // AT4G37490 // AT2G35630 // AT5G48600
GO:0051327	P	M phase of meiotic cell cycle	7	70	219	28397	1.4e-06	1.6e-05	// AT4G21270 // AT5G48600 // AT3G48750 // AT4G04670 // AT2G35630 // AT4G02070 // AT4G37490
GO:0007126	P	meiosis	7	70	219	28397	1.4e-06	1.6e-05	// AT4G21270 // AT5G48600 // AT3G48750 // AT4G04670 // AT2G35630 // AT4G02070 // AT4G37490
GO:0016070	P	RNA metabolic process	25	70	3734	28397	1.5e-06	1.7e-05	// AT5G48600 // AT2G25880 // AT1G73690 // AT2G45490 // AT4G21270 // AT1G76540 // AT2G28450 // AT3G11520 // AT3G01330 // AT4G38890 // AT5G11510 // AT1G77720 // AT1G47870 // AT4G04670 // AT2G35630 // AT5G62020 // AT1G43190 // AT4G19600 // AT2G04660 // AT2G36010 // AT1G18040 // AT5G27620 // AT5G48820 // AT2G25740 // AT5G13840
GO:0006464	P	protein modification process	21	70	2773	28397	2.1e-06	2.4e-05	// AT5G10480 // AT4G16970 // AT4G21270 // AT1G76540 // AT5G24350 // AT5G48600 // AT3G49240 // AT2G25740 // AT1G44110 // AT1G73690 // AT1G18040 // AT1G02970 // AT5G13840 // AT2G45490 // AT1G20930 // AT1G77720 // AT2G35630 // AT3G11520 // AT1G79280 // AT4G37490 // AT2G25880
GO:0019953	P	sexual reproduction	7	70	247	28397	3.1e-06	3.5e-05	// AT3G55000 // AT2G04660 // AT3G07160 // AT3G49240 // AT2G28450 // AT5G13840 // AT4G22910
GO:0009887	P	organ morphogenesis	10	70	629	28397	3.6e-06	4e-05	// AT5G24350 // AT4G21270 // AT4G19600 // AT5G48600 // AT2G36010 // AT1G47870 // AT1G77720 // AT5G11510 // AT4G02070 // AT4G22910
GO:0010467	P	gene expression	28	70	4766	28397	3.6e-06	4e-05	// AT5G48600 // AT1G44110 // AT1G73690 // AT1G02970 // AT2G45490 // AT4G21270 // AT1G76540 // AT5G48820 // AT2G28450 // AT3G11520 // AT3G01330 // AT4G38890 // AT4G16970 // AT5G11510 // AT1G47870 // AT4G04670 // AT2G35630 // AT5G62020 // AT1G43190 // AT4G19600 // AT2G04660 // AT2G36010 // AT1G18040 // AT5G27620 // AT2G25880 // AT1G77720 // AT5G13840 // AT4G37490
GO:0048608	P	reproductive structure development	16	70	1722	28397	3.7e-06	4.1e-05	// AT5G37630 // AT5G18820 // AT5G67260 // AT4G21270 // AT5G24350 // AT5G48600 // AT3G49240 // AT1G44110 // AT5G11510 // AT3G50070 // AT4G34160 // AT3G11520 // AT1G77720 // AT4G02070 // AT1G79280 // AT3G48750
GO:0009886	P	post-embryonic morphogenesis	9	70	503	28397	4.5e-06	4.9e-05	// AT1G15570 // AT4G21270 // AT5G48600 // AT1G44110 // AT5G11510 // AT4G34160 // AT1G77720 // AT4G02070 // AT2G25880
GO:0043412	P	macromolecule modification	22	70	3199	28397	5.3e-06	5.8e-05	// AT5G48600 // AT3G49240 // AT1G44110 // AT1G73690 // AT1G02970 // AT2G45490 // AT1G20930 // AT4G21270 // AT1G76540 // AT3G11520 // AT1G79280 // AT2G25880 // AT5G10480 // AT4G16970 // AT4G04670 // AT2G35630 // AT5G24350 // AT2G25740 // AT1G18040 // AT1G77720 // AT5G13840 // AT4G37490
GO:0009888	P	tissue development	12	70	1015	28397	7e-06	7.6e-05	// AT5G10480 // AT1G76540 // AT4G19600 // AT5G24350 // AT3G49240 // AT2G36010 // AT2G25880 // AT1G47870 // AT4G34160 // AT1G20930 // AT5G65420 // AT4G22910
GO:0044267	P	cellular protein metabolic process	27	70	4775	28397	1.2e-05	0.00013	// AT1G15570 // AT5G48600 // AT3G49240 // AT1G44110 // AT1G73690 // AT1G02970 // AT2G45490 // AT1G20930 // AT4G22910 // AT4G21270 // AT1G76540 // AT3G11520 // AT1G80370 // AT1G43190 // AT2G25880 // AT5G10480 // AT4G16970 // AT5G18820 // AT2G35630 // AT1G79280 // AT5G24350 // AT2G04660 // AT2G25740 // AT1G18040 // AT1G77720 // AT5G13840 // AT4G37490
GO:0006351	P	transcription, DNA-dependent	19	70	2618	28397	1.4e-05	0.00015	// AT1G47870 // AT4G21270 // AT1G76540 // AT4G19600 // AT5G48600 // AT2G36010 // AT2G25880 // AT1G73690 // AT5G11510 // AT1G18040 // AT5G27620 // AT5G13840 // AT5G48820 // AT2G45490 // AT1G77720 // AT2G35630 // AT3G11520 // AT5G62020 // AT3G01330
GO:0032774	P	RNA biosynthetic process	19	70	2621	28397	1.4e-05	0.00015	// AT1G47870 // AT4G21270 // AT1G76540 // AT4G19600 // AT5G48600 // AT2G36010 // AT2G25880 // AT1G73690 // AT5G11510 // AT1G18040 // AT5G27620 // AT5G13840 // AT5G48820 // AT2G45490 // AT1G77720 // AT2G35630 // AT3G11520 // AT5G62020 // AT3G01330
GO:0006350	P	transcription	19	70	2620	28397	1.4e-05	0.00015	// AT1G47870 // AT4G21270 // AT1G76540 // AT4G19600 // AT5G48600 // AT2G36010 // AT2G25880 // AT1G73690 // AT5G11510 // AT1G18040 // AT5G27620 // AT5G13840 // AT5G48820 // AT2G45490 // AT1G77720 // AT2G35630 // AT3G11520 // AT5G62020 // AT3G01330
GO:0051252	P	regulation of RNA metabolic process	18	70	2388	28397	1.5e-05	0.00015	// AT1G47870 // AT3G01330 // AT1G76540 // AT4G19600 // AT5G48600 // AT2G36010 // AT2G25880 // AT5G11510 // AT5G27620 // AT5G13840 // AT5G48820 // AT2G45490 // AT1G77720 // AT2G35630 // AT3G11520 // AT5G62020 // AT1G43190 // AT4G21270
GO:0030154	P	cell differentiation	12	70	1127	28397	2e-05	0.00021	// AT3G55000 // AT5G10480 // AT2G27970 // AT4G19600 // AT5G24350 // AT3G49240 // AT3G07160 // AT2G36010 // AT1G73690 // AT1G47870 // AT2G28450 // AT4G22910
GO:0040007	P	growth	11	70	949	28397	2.1e-05	0.00022	// AT5G10480 // AT1G15570 // AT2G04660 // AT3G07160 // AT2G25880 // AT4G34160 // AT5G13840 // AT5G45550 // AT1G80370 // AT4G37490 // AT4G22910
GO:0044281	P	small molecule metabolic process	24	70	4065	28397	2.3e-05	0.00024	// AT4G24830 // AT3G49240 // AT1G44110 // AT2G45490 // AT5G23250 // AT4G02070 // AT4G21270 // AT1G76540 // AT5G48600 // AT1G77670 // AT2G28450 // AT3G11520 // AT2G25880 // AT5G10480 // AT1G02970 // AT5G04040 // AT5G18820 // AT4G04670 // AT2G35630 // AT2G36010 // AT5G27620 // AT1G77720 // AT5G13840 // AT4G37490
GO:0006396	P	RNA processing	11	70	967	28397	2.5e-05	0.00026	// AT4G19600 // AT5G48600 // AT2G04660 // AT1G73690 // AT1G18040 // AT2G28450 // AT5G27620 // AT4G04670 // AT1G77720 // AT1G43190 // AT4G38890
GO:0009909	P	regulation of flower development	7	70	359	28397	3.3e-05	0.00033	// AT4G21270 // AT5G48600 // AT3G49240 // AT1G44110 // AT3G11520 // AT1G77720 // AT1G79280
GO:0031047	P	gene silencing by RNA	7	70	371	28397	4e-05	0.00041	// AT1G02970 // AT4G21270 // AT5G48600 // AT2G04660 // AT5G48820 // AT1G77720 // AT5G13840
GO:0010090	P	trichome morphogenesis	5	70	151	28397	4.2e-05	0.00042	// AT2G36010 // AT1G47870 // AT4G19600 // AT5G24350 // AT4G22910
GO:0048609	P	reproductive process in a multicellular organism	7	70	378	28397	4.5e-05	0.00045	// AT3G55000 // AT2G04660 // AT3G07160 // AT3G49240 // AT2G28450 // AT5G13840 // AT4G22910
GO:0006355	P	regulation of transcription, DNA-dependent	17	70	2372	28397	5.1e-05	0.00051	// AT1G47870 // AT4G21270 // AT1G76540 // AT4G19600 // AT5G48600 // AT2G36010 // AT2G25880 // AT5G11510 // AT5G27620 // AT5G13840 // AT5G48820 // AT2G45490 // AT1G77720 // AT2G35630 // AT3G11520 // AT5G62020 // AT3G01330
GO:0010016	P	shoot morphogenesis	8	70	529	28397	5.1e-05	0.00051	// AT4G19600 // AT5G24350 // AT2G36010 // AT1G44110 // AT1G47870 // AT4G34160 // AT2G25880 // AT4G22910
GO:0045449	P	regulation of transcription	17	70	2376	28397	5.2e-05	0.00051	// AT1G47870 // AT4G21270 // AT1G76540 // AT4G19600 // AT5G48600 // AT2G36010 // AT2G25880 // AT5G11510 // AT5G27620 // AT5G13840 // AT5G48820 // AT2G45490 // AT1G77720 // AT2G35630 // AT3G11520 // AT5G62020 // AT3G01330
GO:0048229	P	gametophyte development	8	70	533	28397	5.4e-05	0.00053	// AT3G55000 // AT1G02970 // AT3G49240 // AT3G07160 // AT3G48750 // AT2G04660 // AT2G28450 // AT5G45550
GO:0019538	P	protein metabolic process	27	70	5220	28397	6.2e-05	0.00061	// AT1G15570 // AT5G48600 // AT3G49240 // AT1G44110 // AT1G73690 // AT1G02970 // AT2G45490 // AT1G20930 // AT4G22910 // AT4G21270 // AT1G76540 // AT3G11520 // AT1G80370 // AT1G43190 // AT2G25880 // AT5G10480 // AT4G16970 // AT5G18820 // AT2G35630 // AT1G79280 // AT5G24350 // AT2G04660 // AT2G25740 // AT1G18040 // AT1G77720 // AT5G13840 // AT4G37490
GO:0010026	P	trichome differentiation	5	70	168	28397	6.9e-05	0.00066	// AT2G36010 // AT1G47870 // AT4G19600 // AT5G24350 // AT4G22910
GO:0016049	P	cell growth	9	70	715	28397	6.9e-05	0.00066	// AT5G10480 // AT1G15570 // AT2G04660 // AT3G07160 // AT5G13840 // AT5G45550 // AT1G80370 // AT4G37490 // AT4G22910
GO:0032504	P	multicellular organism reproduction	7	70	405	28397	6.9e-05	0.00066	// AT3G55000 // AT2G04660 // AT3G07160 // AT3G49240 // AT2G28450 // AT5G13840 // AT4G22910
GO:0035315	P	hair cell differentiation	5	70	168	28397	6.9e-05	0.00066	// AT2G36010 // AT1G47870 // AT4G19600 // AT5G24350 // AT4G22910
GO:0022621	P	shoot system development	9	70	723	28397	7.5e-05	0.00071	// AT4G19600 // AT5G24350 // AT3G49240 // AT2G36010 // AT1G44110 // AT1G47870 // AT4G34160 // AT2G25880 // AT4G22910
GO:0048367	P	shoot development	9	70	723	28397	7.5e-05	0.00071	// AT4G19600 // AT5G24350 // AT3G49240 // AT2G36010 // AT1G44110 // AT1G47870 // AT4G34160 // AT2G25880 // AT4G22910
GO:0006950	P	response to stress	23	70	4089	28397	8e-05	0.00075	// AT1G15570 // AT5G48600 // AT3G49240 // AT5G58003 // AT5G45550 // AT4G02070 // AT4G22910 // AT5G43080 // AT1G54440 // AT1G80370 // AT5G37630 // AT1G02970 // AT3G48750 // AT1G47870 // AT5G18820 // AT4G04670 // AT5G62020 // AT2G04660 // AT4G37490 // AT5G27620 // AT1G77720 // AT5G13840 // AT3G17020
GO:0048449	P	floral organ formation	5	70	174	28397	8.1e-05	0.00075	// AT4G02070 // AT4G21270 // AT5G11510 // AT5G48600 // AT1G77720
GO:0008361	P	regulation of cell size	9	70	739	28397	8.8e-05	0.00082	// AT5G10480 // AT1G15570 // AT2G04660 // AT3G07160 // AT5G13840 // AT5G45550 // AT1G80370 // AT4G37490 // AT4G22910
GO:0090066	P	regulation of anatomical structure size	9	70	752	28397	0.0001	0.00092	// AT5G10480 // AT1G15570 // AT2G04660 // AT3G07160 // AT5G13840 // AT5G45550 // AT1G80370 // AT4G37490 // AT4G22910
GO:0032535	P	regulation of cellular component size	9	70	752	28397	0.0001	0.00092	// AT5G10480 // AT1G15570 // AT2G04660 // AT3G07160 // AT5G13840 // AT5G45550 // AT1G80370 // AT4G37490 // AT4G22910
GO:0006468	P	protein amino acid phosphorylation	11	70	1134	28397	0.0001	0.00095	// AT5G10480 // AT4G16970 // AT1G76540 // AT1G44110 // AT1G73690 // AT1G18040 // AT2G45490 // AT1G20930 // AT1G77720 // AT2G35630 // AT2G25880
GO:0009615	P	response to virus	5	70	185	28397	0.00011	0.00097	// AT1G54440 // AT1G77720 // AT4G19600 // AT5G48600 // AT2G04660
GO:0048645	P	organ formation	5	70	192	28397	0.00013	0.0011	// AT4G02070 // AT4G21270 // AT5G11510 // AT5G48600 // AT1G77720
GO:0048589	P	developmental growth	9	70	791	28397	0.00015	0.0013	// AT5G10480 // AT1G15570 // AT2G04660 // AT3G07160 // AT2G25880 // AT4G34160 // AT5G13840 // AT1G80370 // AT4G22910
GO:0048580	P	regulation of post-embryonic development	7	70	459	28397	0.00015	0.0013	// AT4G21270 // AT5G48600 // AT3G49240 // AT1G44110 // AT3G11520 // AT1G77720 // AT1G79280
GO:0048646	P	anatomical structure formation involved in morphogenesis	6	70	331	28397	0.00018	0.0016	// AT1G15570 // AT4G21270 // AT5G48600 // AT5G11510 // AT1G77720 // AT4G02070
GO:0009165	P	nucleotide biosynthetic process	6	70	336	28397	0.0002	0.0017	// AT4G24830 // AT3G49240 // AT2G36010 // AT5G27620 // AT5G18820 // AT5G23250
GO:0060560	P	developmental growth involved in morphogenesis	7	70	502	28397	0.00025	0.0022	// AT5G10480 // AT1G15570 // AT2G04660 // AT3G07160 // AT5G13840 // AT1G80370 // AT4G22910
GO:0006974	P	response to DNA damage stimulus	6	70	352	28397	0.00025	0.0022	// AT5G43080 // AT1G02970 // AT1G47870 // AT4G04670 // AT4G02070 // AT4G37490
GO:0009826	P	unidimensional cell growth	7	70	502	28397	0.00025	0.0022	// AT5G10480 // AT1G15570 // AT2G04660 // AT3G07160 // AT5G13840 // AT1G80370 // AT4G22910
GO:0048563	P	post-embryonic organ morphogenesis	5	70	233	28397	0.0003	0.0026	// AT4G02070 // AT4G21270 // AT5G11510 // AT5G48600 // AT1G77720
GO:0048444	P	floral organ morphogenesis	5	70	233	28397	0.0003	0.0026	// AT4G02070 // AT4G21270 // AT5G11510 // AT5G48600 // AT1G77720
GO:0010033	P	response to organic substance	17	70	2754	28397	0.00031	0.0027	// AT1G15570 // AT1G76540 // AT5G48600 // AT3G49240 // AT1G44110 // AT2G04660 // AT5G11510 // AT4G34160 // AT3G11520 // AT1G20930 // AT1G77720 // AT5G13840 // AT1G80370 // AT4G22910 // AT3G17020 // AT5G62020 // AT5G65420
GO:0009553	P	embryo sac development	5	70	245	28397	0.00038	0.0033	// AT3G55000 // AT5G45550 // AT2G04660 // AT2G28450 // AT3G49240
GO:0055086	P	nucleobase, nucleoside and nucleotide metabolic process	8	70	726	28397	0.00043	0.0037	// AT4G04670 // AT4G24830 // AT3G49240 // AT2G36010 // AT5G27620 // AT5G18820 // AT5G23250 // AT4G02070
GO:0000904	P	cell morphogenesis involved in differentiation	6	70	408	28397	0.00055	0.0046	// AT4G19600 // AT5G24350 // AT3G07160 // AT2G36010 // AT1G47870 // AT4G22910
GO:0009908	P	flower development	9	70	948	28397	0.00055	0.0046	// AT4G21270 // AT5G48600 // AT3G49240 // AT1G44110 // AT5G11510 // AT3G11520 // AT1G77720 // AT4G02070 // AT1G79280
GO:0002252	P	immune effector process	5	70	273	28397	0.00062	0.0052	// AT1G54440 // AT5G62020 // AT1G77720 // AT5G48600 // AT2G04660
GO:0065008	P	regulation of biological quality	12	70	1654	28397	0.0007	0.0058	// AT5G10480 // AT1G15570 // AT2G04660 // AT3G07160 // AT1G77720 // AT4G04670 // AT1G54440 // AT5G13840 // AT5G45550 // AT1G80370 // AT4G37490 // AT4G22910
GO:0048366	P	leaf development	6	70	451	28397	0.00091	0.0076	// AT4G19600 // AT5G24350 // AT3G49240 // AT2G36010 // AT1G47870 // AT4G22910
GO:0008380	P	RNA splicing	5	70	302	28397	0.00096	0.008	// AT5G27620 // AT1G43190 // AT1G73690 // AT4G19600 // AT1G18040
GO:0006281	P	DNA repair	5	70	307	28397	0.001	0.0085	// AT1G47870 // AT5G43080 // AT4G02070 // AT4G37490 // AT1G02970
GO:0009913	P	epidermal cell differentiation	6	70	467	28397	0.0011	0.0089	// AT5G10480 // AT4G19600 // AT5G24350 // AT2G36010 // AT1G47870 // AT4G22910
GO:0007398	P	ectoderm development	6	70	469	28397	0.0011	0.009	// AT5G10480 // AT4G19600 // AT5G24350 // AT2G36010 // AT1G47870 // AT4G22910
GO:0008544	P	epidermis development	6	70	469	28397	0.0011	0.009	// AT5G10480 // AT4G19600 // AT5G24350 // AT2G36010 // AT1G47870 // AT4G22910
GO:0009259	P	ribonucleotide metabolic process	5	70	323	28397	0.0013	0.01	// AT4G02070 // AT5G18820 // AT5G27620 // AT5G23250 // AT3G49240
GO:0048827	P	phyllome development	6	70	497	28397	0.0015	0.012	// AT4G19600 // AT5G24350 // AT3G49240 // AT2G36010 // AT1G47870 // AT4G22910
GO:0009117	P	nucleotide metabolic process	7	70	685	28397	0.0015	0.012	// AT4G24830 // AT3G49240 // AT2G36010 // AT5G27620 // AT5G18820 // AT5G23250 // AT4G02070
GO:0006753	P	nucleoside phosphate metabolic process	7	70	687	28397	0.0016	0.013	// AT4G24830 // AT3G49240 // AT2G36010 // AT5G27620 // AT5G18820 // AT5G23250 // AT4G02070
GO:0051716	P	cellular response to stimulus	14	70	2355	28397	0.0017	0.013	// AT5G43080 // AT1G02970 // AT1G76540 // AT1G20930 // AT5G48600 // AT3G49240 // AT3G48750 // AT2G04660 // AT1G47870 // AT5G18820 // AT4G04670 // AT1G77720 // AT4G02070 // AT4G37490
GO:0048316	P	seed development	7	70	696	28397	0.0017	0.013	// AT5G37630 // AT3G50070 // AT5G67260 // AT3G49240 // AT3G48750 // AT4G34160 // AT5G18820
GO:0009628	P	response to abiotic stimulus	15	70	2635	28397	0.0017	0.013	// AT5G37630 // AT5G18820 // AT3G49240 // AT3G17020 // AT3G48750 // AT1G47870 // AT5G58003 // AT5G27620 // AT5G10480 // AT2G45490 // AT4G04670 // AT2G35630 // AT5G45550 // AT4G02070 // AT4G37490
GO:0048468	P	cell development	7	70	699	28397	0.0017	0.014	// AT5G10480 // AT4G19600 // AT5G24350 // AT3G07160 // AT2G36010 // AT1G47870 // AT4G22910
GO:0009965	P	leaf morphogenesis	5	70	347	28397	0.0018	0.014	// AT2G36010 // AT1G47870 // AT4G19600 // AT5G24350 // AT4G22910
GO:0010608	P	posttranscriptional regulation of gene expression	5	70	347	28397	0.0018	0.014	// AT4G16970 // AT1G43190 // AT1G77720 // AT5G48600 // AT2G04660
GO:0010154	P	fruit development	7	70	721	28397	0.0021	0.016	// AT5G37630 // AT3G50070 // AT5G67260 // AT3G49240 // AT3G48750 // AT4G34160 // AT5G18820
GO:0017038	P	protein import	5	70	368	28397	0.0023	0.017	// AT3G07160 // AT1G79280 // AT5G04040 // AT2G28450 // AT5G23250
GO:0042221	P	response to chemical stimulus	19	70	3978	28397	0.0029	0.022	// AT1G15570 // AT1G76540 // AT5G48600 // AT3G49240 // AT1G44110 // AT2G04660 // AT5G11510 // AT5G27620 // AT5G18820 // AT4G34160 // AT3G11520 // AT1G20930 // AT1G77720 // AT5G13840 // AT1G80370 // AT4G22910 // AT3G17020 // AT5G62020 // AT5G65420
GO:0006511	P	ubiquitin-dependent protein catabolic process	5	70	407	28397	0.0035	0.026	// AT5G13840 // AT1G15570 // AT2G04660 // AT1G80370 // AT4G22910
GO:0019941	P	modification-dependent protein catabolic process	5	70	412	28397	0.0037	0.028	// AT5G13840 // AT1G15570 // AT2G04660 // AT1G80370 // AT4G22910
GO:0043632	P	modification-dependent macromolecule catabolic process	5	70	412	28397	0.0037	0.028	// AT5G13840 // AT1G15570 // AT2G04660 // AT1G80370 // AT4G22910
GO:0048437	P	floral organ development	6	70	605	28397	0.0039	0.029	// AT4G21270 // AT5G48600 // AT5G11510 // AT1G77720 // AT4G02070 // AT1G79280
GO:0048569	P	post-embryonic organ development	6	70	608	28397	0.004	0.03	// AT4G21270 // AT5G48600 // AT5G11510 // AT1G77720 // AT4G02070 // AT1G79280
GO:0051603	P	proteolysis involved in cellular protein catabolic process	5	70	497	28397	0.0079	0.059	// AT5G13840 // AT1G15570 // AT2G04660 // AT1G80370 // AT4G22910
GO:0048507	P	meristem development	5	70	498	28397	0.008	0.059	// AT4G34160 // AT2G25880 // AT1G76540 // AT1G20930 // AT3G49240
GO:0009607	P	response to biotic stimulus	10	70	1687	28397	0.0083	0.061	// AT1G15570 // AT4G19600 // AT5G48600 // AT2G04660 // AT1G77720 // AT5G13840 // AT1G54440 // AT1G80370 // AT3G17020 // AT4G22910
GO:0044257	P	cellular protein catabolic process	5	70	525	28397	0.0099	0.072	// AT5G13840 // AT1G15570 // AT2G04660 // AT1G80370 // AT4G22910
GO:0030163	P	protein catabolic process	5	70	540	28397	0.011	0.081	// AT5G13840 // AT1G15570 // AT2G04660 // AT1G80370 // AT4G22910
GO:0009314	P	response to radiation	8	70	1263	28397	0.013	0.092	// AT5G10480 // AT5G18820 // AT3G49240 // AT1G47870 // AT2G45490 // AT4G04670 // AT4G02070 // AT4G37490
GO:0044248	P	cellular catabolic process	11	70	2095	28397	0.013	0.097	// AT1G15570 // AT4G24830 // AT2G04660 // AT2G25740 // AT5G04040 // AT1G77670 // AT4G11570 // AT5G13840 // AT4G02070 // AT1G80370 // AT4G22910
GO:0048522	P	positive regulation of cellular process	6	70	793	28397	0.014	0.099	// AT4G16970 // AT4G19600 // AT5G24350 // AT2G36010 // AT3G48750 // AT2G45490
GO:0009056	P	catabolic process	11	70	2182	28397	0.018	0.13	// AT1G15570 // AT4G24830 // AT2G04660 // AT2G25740 // AT5G04040 // AT1G77670 // AT4G11570 // AT5G13840 // AT4G02070 // AT1G80370 // AT4G22910
GO:0048518	P	positive regulation of biological process	6	70	896	28397	0.023	0.17	// AT4G16970 // AT4G19600 // AT5G24350 // AT2G36010 // AT3G48750 // AT2G45490
GO:0046907	P	intracellular transport	8	70	1423	28397	0.024	0.17	// AT3G07160 // AT5G04040 // AT2G28450 // AT5G23250 // AT5G27970 // AT5G45550 // AT1G79280 // AT3G17020
GO:0006605	P	protein targeting	6	70	906	28397	0.025	0.17	// AT3G07160 // AT5G04040 // AT2G28450 // AT5G23250 // AT1G79280 // AT3G17020
GO:0033554	P	cellular response to stress	8	70	1473	28397	0.029	0.2	// AT5G43080 // AT1G02970 // AT3G48750 // AT1G47870 // AT5G18820 // AT4G04670 // AT4G02070 // AT4G37490
GO:0006508	P	proteolysis	6	70	943	28397	0.029	0.21	// AT1G15570 // AT2G04660 // AT2G25740 // AT5G13840 // AT1G80370 // AT4G22910
GO:0044265	P	cellular macromolecule catabolic process	7	70	1208	28397	0.029	0.21	// AT1G15570 // AT2G04660 // AT2G25740 // AT5G04040 // AT5G13840 // AT1G80370 // AT4G22910
GO:0009057	P	macromolecule catabolic process	7	70	1255	28397	0.035	0.25	// AT1G15570 // AT2G04660 // AT2G25740 // AT5G04040 // AT5G13840 // AT1G80370 // AT4G22910
GO:0033036	P	macromolecule localization	8	70	1541	28397	0.036	0.25	// AT4G04670 // AT3G49240 // AT3G07160 // AT5G04040 // AT2G28450 // AT5G23250 // AT1G79280 // AT3G17020
GO:0051649	P	establishment of localization in cell	8	70	1554	28397	0.037	0.26	// AT3G07160 // AT5G04040 // AT2G28450 // AT5G23250 // AT5G27970 // AT5G45550 // AT1G79280 // AT3G17020
GO:0046483	P	heterocycle metabolic process	6	70	1023	28397	0.041	0.28	// AT3G49240 // AT4G11570 // AT5G18820 // AT5G23250 // AT4G02070 // AT5G27620
GO:0006886	P	intracellular protein transport	6	70	1044	28397	0.044	0.3	// AT3G07160 // AT5G04040 // AT2G28450 // AT5G23250 // AT1G79280 // AT3G17020
GO:0051641	P	cellular localization	8	70	1613	28397	0.045	0.31	// AT3G07160 // AT5G04040 // AT2G28450 // AT5G23250 // AT5G27970 // AT5G45550 // AT1G79280 // AT3G17020
GO:0034613	P	cellular protein localization	6	70	1059	28397	0.047	0.32	// AT3G07160 // AT5G04040 // AT2G28450 // AT5G23250 // AT1G79280 // AT3G17020
GO:0009743	P	response to carbohydrate stimulus	5	70	812	28397	0.051	0.34	// AT4G34160 // AT5G62020 // AT5G65420 // AT5G11510 // AT3G49240
GO:0070727	P	cellular macromolecule localization	6	70	1093	28397	0.053	0.36	// AT3G07160 // AT5G04040 // AT2G28450 // AT5G23250 // AT1G79280 // AT3G17020
GO:0045184	P	establishment of protein localization	6	70	1160	28397	0.067	0.45	// AT3G07160 // AT5G04040 // AT2G28450 // AT5G23250 // AT1G79280 // AT3G17020
GO:0015031	P	protein transport	6	70	1160	28397	0.067	0.45	// AT3G07160 // AT5G04040 // AT2G28450 // AT5G23250 // AT1G79280 // AT3G17020
GO:0008104	P	protein localization	6	70	1216	28397	0.08	0.53	// AT3G07160 // AT5G04040 // AT2G28450 // AT5G23250 // AT1G79280 // AT3G17020
GO:0071310	P	cellular response to organic substance	6	70	1234	28397	0.084	0.56	// AT1G76540 // AT5G48600 // AT2G04660 // AT3G49240 // AT1G20930 // AT1G77720
GO:0009266	P	response to temperature stimulus	5	70	962	28397	0.089	0.59	// AT5G37630 // AT3G48750 // AT5G18820 // AT3G17020 // AT3G49240
GO:0002376	P	immune system process	5	70	984	28397	0.096	0.63	// AT1G54440 // AT5G62020 // AT1G77720 // AT5G48600 // AT2G04660
GO:0006955	P	immune response	5	70	984	28397	0.096	0.63	// AT1G54440 // AT5G62020 // AT1G77720 // AT5G48600 // AT2G04660
GO:0070887	P	cellular response to chemical stimulus	6	70	1417	28397	0.14	0.9	// AT1G76540 // AT5G48600 // AT2G04660 // AT3G49240 // AT1G20930 // AT1G77720
GO:0051707	P	response to other organism	6	70	1421	28397	0.14	0.9	// AT4G19600 // AT5G48600 // AT2G04660 // AT1G77720 // AT1G54440 // AT3G17020
GO:0023046	P	signaling process	7	70	1768	28397	0.15	0.94	// AT1G76540 // AT2G04660 // AT3G49240 // AT1G20930 // AT1G77720 // AT5G13840 // AT4G22910
GO:0023060	P	signal transmission	7	70	1767	28397	0.14	0.94	// AT1G76540 // AT2G04660 // AT3G49240 // AT1G20930 // AT1G77720 // AT5G13840 // AT4G22910
GO:0007165	P	signal transduction	5	70	1670	28397	0.4	1	// AT5G13840 // AT4G22910 // AT1G76540 // AT1G20930 // AT3G49240
GO:0051704	P	multi-organism process	7	70	1820	28397	0.16	1	// AT4G19600 // AT5G48600 // AT2G04660 // AT3G07160 // AT1G77720 // AT1G54440 // AT3G17020
GO:0043436	P	oxoacid metabolic process	5	70	2103	28397	0.6	1	// AT5G10480 // AT5G04040 // AT1G77670 // AT4G24830 // AT2G28450
GO:0023052	P	signaling	8	70	2376	28397	0.23	1	// AT1G76540 // AT2G04660 // AT3G48750 // AT3G49240 // AT1G20930 // AT1G77720 // AT5G13840 // AT4G22910
GO:0006952	P	defense response	5	70	1653	28397	0.39	1	// AT1G54440 // AT5G62020 // AT1G77720 // AT5G48600 // AT2G04660
GO:0009416	P	response to light stimulus	5	70	1188	28397	0.17	1	// AT5G18820 // AT5G10480 // AT4G02070 // AT2G45490 // AT3G49240
GO:0051234	P	establishment of localization	9	70	3652	28397	0.55	1	// AT4G04670 // AT3G07160 // AT5G04040 // AT2G28450 // AT5G23250 // AT5G27970 // AT5G45550 // AT1G79280 // AT3G17020
GO:0006810	P	transport	9	70	3577	28397	0.53	1	// AT4G04670 // AT3G07160 // AT5G04040 // AT2G28450 // AT5G23250 // AT5G27970 // AT5G45550 // AT1G79280 // AT3G17020
GO:0006082	P	organic acid metabolic process	5	70	2105	28397	0.6	1	// AT5G10480 // AT5G04040 // AT1G77670 // AT4G24830 // AT2G28450
GO:0042180	P	cellular ketone metabolic process	5	70	2123	28397	0.61	1	// AT5G10480 // AT5G04040 // AT1G77670 // AT4G24830 // AT2G28450
GO:0019752	P	carboxylic acid metabolic process	5	70	2103	28397	0.6	1	// AT5G10480 // AT5G04040 // AT1G77670 // AT4G24830 // AT2G28450
GO:0051179	P	localization	10	70	3819	28397	0.47	1	// AT4G04670 // AT3G49240 // AT3G07160 // AT5G04040 // AT2G28450 // AT5G23250 // AT5G27970 // AT5G45550 // AT1G79280 // AT3G17020
GO:0016538	F	cyclin-dependent protein kinase regulator activity	12	70	34	28397	6.6e-22	8.2e-20	// AT5G43080 // AT1G15570 // AT2G27970 // AT3G50630 // AT1G44110 // AT4G34160 // AT5G48820 // AT3G11520 // AT1G80370 // AT4G37490 // AT2G26760 // AT5G65420
GO:0019887	F	protein kinase regulator activity	12	70	42	28397	5.7e-21	3.6e-19	// AT5G43080 // AT1G15570 // AT2G27970 // AT3G50630 // AT1G44110 // AT4G34160 // AT5G48820 // AT3G11520 // AT1G80370 // AT4G37490 // AT2G26760 // AT5G65420
GO:0019207	F	kinase regulator activity	12	70	45	28397	1.2e-20	4.9e-19	// AT5G43080 // AT1G15570 // AT2G27970 // AT3G50630 // AT1G44110 // AT4G34160 // AT5G48820 // AT3G11520 // AT1G80370 // AT4G37490 // AT2G26760 // AT5G65420
GO:0005515	F	protein binding	37	70	2709	28397	8.6e-20	2.7e-18	// AT1G15570 // AT3G50070 // AT2G01910 // AT1G73690 // AT5G58003 // AT1G20930 // AT1G16330 // AT4G02070 // AT5G65420 // AT3G55000 // AT5G43080 // AT5G67260 // AT1G76540 // AT3G11520 // AT1G80370 // AT4G22910 // AT1G44110 // AT1G02970 // AT2G27970 // AT1G47870 // AT3G48750 // AT5G11510 // AT2G35630 // AT3G50630 // AT1G79280 // AT2G26760 // AT3G01330 // AT1G47210 // AT4G19600 // AT2G04660 // AT2G36…
GO:0004693	F	cyclin-dependent protein kinase activity	10	70	32	28397	5.7e-18	1.4e-16	// AT3G50070 // AT5G67260 // AT2G27970 // AT4G19600 // AT3G48750 // AT5G27620 // AT1G76540 // AT1G20930 // AT1G16330 // AT1G47210
GO:0019901	F	protein kinase binding	10	70	70	28397	5.9e-15	1.2e-13	// AT5G43080 // AT1G15570 // AT1G47210 // AT4G19600 // AT1G44110 // AT5G27620 // AT3G11520 // AT1G80370 // AT4G37490 // AT2G26760
GO:0019900	F	kinase binding	10	70	75	28397	1.1e-14	2e-13	// AT5G43080 // AT1G15570 // AT1G47210 // AT4G19600 // AT1G44110 // AT5G27620 // AT3G11520 // AT1G80370 // AT4G37490 // AT2G26760
GO:0019899	F	enzyme binding	11	70	155	28397	3e-13	4.8e-12	// AT5G43080 // AT1G15570 // AT1G47210 // AT4G19600 // AT2G04660 // AT1G44110 // AT5G27620 // AT3G11520 // AT1G80370 // AT4G37490 // AT2G26760
GO:0005488	F	binding	57	70	11247	28397	9.9e-13	1.4e-11	// AT1G15570 // AT5G23250 // AT5G48600 // AT3G49240 // AT2G01910 // AT1G73690 // AT4G16970 // AT3G50630 // AT2G45490 // AT1G04730 // AT1G16330 // AT4G02070 // AT5G27620 // AT5G65420 // AT3G55000 // AT5G43080 // AT5G58003 // AT5G67260 // AT1G76540 // AT4G24830 // AT1G77670 // AT2G28450 // AT3G11520 // AT1G54440 // AT1G80370 // AT4G22910 // AT1G44110 // AT2G46560 // AT2G27970 // AT1G47870 // AT3G48…
GO:0030234	F	enzyme regulator activity	13	70	376	28397	1.1e-11	1.4e-10	// AT5G43080 // AT1G15570 // AT2G27970 // AT3G50630 // AT1G44110 // AT4G34160 // AT5G48820 // AT3G11520 // AT5G27970 // AT1G80370 // AT4G37490 // AT2G26760 // AT5G65420
GO:0004674	F	protein serine/threonine kinase activity	17	70	940	28397	1.1e-10	1.3e-09	// AT4G16970 // AT5G67260 // AT1G76540 // AT4G19600 // AT3G50070 // AT3G48750 // AT1G73690 // AT1G18040 // AT5G27620 // AT2G27970 // AT1G02970 // AT2G45490 // AT2G25880 // AT1G20930 // AT1G77720 // AT1G16330 // AT1G47210
GO:0004672	F	protein kinase activity	17	70	1113	28397	1.4e-09	1.5e-08	// AT4G16970 // AT5G67260 // AT1G76540 // AT4G19600 // AT3G50070 // AT3G48750 // AT1G73690 // AT1G18040 // AT5G27620 // AT2G27970 // AT1G02970 // AT2G45490 // AT2G25880 // AT1G20930 // AT1G77720 // AT1G16330 // AT1G47210
GO:0016773	F	phosphotransferase activity, alcohol group as acceptor	17	70	1275	28397	1.1e-08	1e-07	// AT4G16970 // AT5G67260 // AT1G76540 // AT4G19600 // AT3G50070 // AT3G48750 // AT1G73690 // AT1G18040 // AT5G27620 // AT2G27970 // AT1G02970 // AT2G45490 // AT2G25880 // AT1G20930 // AT1G77720 // AT1G16330 // AT1G47210
GO:0016301	F	kinase activity	17	70	1356	28397	2.6e-08	2.3e-07	// AT4G16970 // AT5G67260 // AT1G76540 // AT4G19600 // AT3G50070 // AT3G48750 // AT1G73690 // AT1G18040 // AT5G27620 // AT2G27970 // AT1G02970 // AT2G45490 // AT2G25880 // AT1G20930 // AT1G77720 // AT1G16330 // AT1G47210
GO:0016772	F	transferase activity, transferring phosphorus-containing groups	17	70	1590	28397	2.5e-07	2.1e-06	// AT4G16970 // AT5G67260 // AT1G76540 // AT4G19600 // AT3G50070 // AT3G48750 // AT1G73690 // AT1G18040 // AT5G27620 // AT2G27970 // AT1G02970 // AT2G45490 // AT2G25880 // AT1G20930 // AT1G77720 // AT1G16330 // AT1G47210
GO:0016740	F	transferase activity	22	70	3012	28397	2e-06	1.6e-05	// AT5G23250 // AT2G25880 // AT1G73690 // AT3G50070 // AT2G45490 // AT1G20930 // AT1G16330 // AT5G67260 // AT1G76540 // AT3G07160 // AT1G77670 // AT2G28450 // AT4G16970 // AT2G27970 // AT3G48750 // AT4G04670 // AT1G47210 // AT4G19600 // AT1G18040 // AT5G27620 // AT1G02970 // AT1G77720
GO:0005524	F	ATP binding	16	70	1996	28397	2.3e-05	0.00017	// AT4G16970 // AT4G21270 // AT1G76540 // AT4G24830 // AT5G48600 // AT3G49240 // AT3G48750 // AT1G73690 // AT1G18040 // AT5G18820 // AT1G02970 // AT2G45490 // AT1G20930 // AT1G04730 // AT1G77720 // AT2G25880
GO:0001883	F	purine nucleoside binding	17	70	2333	28397	4.1e-05	0.00026	// AT4G16970 // AT4G21270 // AT1G76540 // AT4G24830 // AT5G48600 // AT3G49240 // AT3G48750 // AT1G73690 // AT1G18040 // AT5G18820 // AT1G02970 // AT2G45490 // AT2G25880 // AT1G20930 // AT1G04730 // AT1G77720 // AT4G38890
GO:0017076	F	purine nucleotide binding	18	70	2595	28397	4.4e-05	0.00026	// AT4G16970 // AT4G21270 // AT1G76540 // AT4G24830 // AT5G48600 // AT3G49240 // AT3G48750 // AT1G73690 // AT5G04040 // AT1G18040 // AT5G18820 // AT1G02970 // AT2G45490 // AT2G25880 // AT1G20930 // AT1G04730 // AT1G77720 // AT4G38890
GO:0030554	F	adenyl nucleotide binding	17	70	2331	28397	4.1e-05	0.00026	// AT4G16970 // AT4G21270 // AT1G76540 // AT4G24830 // AT5G48600 // AT3G49240 // AT3G48750 // AT1G73690 // AT1G18040 // AT5G18820 // AT1G02970 // AT2G45490 // AT2G25880 // AT1G20930 // AT1G04730 // AT1G77720 // AT4G38890
GO:0001882	F	nucleoside binding	17	70	2341	28397	4.3e-05	0.00026	// AT4G16970 // AT4G21270 // AT1G76540 // AT4G24830 // AT5G48600 // AT3G49240 // AT3G48750 // AT1G73690 // AT1G18040 // AT5G18820 // AT1G02970 // AT2G45490 // AT2G25880 // AT1G20930 // AT1G04730 // AT1G77720 // AT4G38890
GO:0000166	F	nucleotide binding	21	70	3438	28397	5.6e-05	0.00032	// AT2G46560 // AT4G21270 // AT1G76540 // AT1G04730 // AT5G48600 // AT3G49240 // AT3G48750 // AT1G73690 // AT5G04040 // AT4G16970 // AT1G18040 // AT5G18820 // AT1G02970 // AT2G45490 // AT2G25880 // AT1G20930 // AT5G23250 // AT1G77720 // AT4G24830 // AT1G43190 // AT4G38890
GO:0032555	F	purine ribonucleotide binding	17	70	2429	28397	6.8e-05	0.00034	// AT4G16970 // AT4G21270 // AT1G76540 // AT4G24830 // AT5G48600 // AT3G49240 // AT3G48750 // AT1G73690 // AT5G04040 // AT1G18040 // AT5G18820 // AT1G02970 // AT2G45490 // AT1G20930 // AT1G04730 // AT1G77720 // AT2G25880
GO:0032553	F	ribonucleotide binding	17	70	2429	28397	6.8e-05	0.00034	// AT4G16970 // AT4G21270 // AT1G76540 // AT4G24830 // AT5G48600 // AT3G49240 // AT3G48750 // AT1G73690 // AT5G04040 // AT1G18040 // AT5G18820 // AT1G02970 // AT2G45490 // AT1G20930 // AT1G04730 // AT1G77720 // AT2G25880
GO:0032559	F	adenyl ribonucleotide binding	16	70	2169	28397	6.3e-05	0.00034	// AT4G16970 // AT4G21270 // AT1G76540 // AT4G24830 // AT5G48600 // AT3G49240 // AT3G48750 // AT1G73690 // AT1G18040 // AT5G18820 // AT1G02970 // AT2G45490 // AT1G20930 // AT1G04730 // AT1G77720 // AT2G25880
GO:0003824	F	catalytic activity	34	70	8787	28397	0.0015	0.0074	// AT5G58003 // AT1G04730 // AT4G24830 // AT2G25880 // AT1G73690 // AT1G02970 // AT4G11570 // AT2G45490 // AT5G23250 // AT1G16330 // AT4G02070 // AT5G67260 // AT1G76540 // AT3G07160 // AT1G77670 // AT2G28450 // AT1G54440 // AT4G38890 // AT5G10480 // AT4G16970 // AT2G27970 // AT3G48750 // AT5G04040 // AT4G21270 // AT4G04670 // AT3G50070 // AT1G47210 // AT4G19600 // AT2G04660 // AT2G25740 // AT1G20…
GO:0003676	F	nucleic acid binding	10	70	4194	28397	0.6	1	// AT1G47870 // AT3G01330 // AT2G36010 // AT5G11510 // AT2G28450 // AT5G62020 // AT1G54440 // AT4G02070 // AT1G43190 // AT4G38890
GO:0003677	F	DNA binding	6	70	2399	28397	0.55	1	// AT2G36010 // AT1G47870 // AT5G11510 // AT4G02070 // AT3G01330 // AT5G62020
GO:0003700	F	transcription factor activity	5	70	1682	28397	0.4	1	// AT1G47870 // AT2G36010 // AT5G62020 // AT3G01330 // AT5G11510
GO:0016787	F	hydrolase activity	9	70	3099	28397	0.35	1	// AT5G10480 // AT5G58003 // AT4G21270 // AT2G25740 // AT5G04040 // AT4G11570 // AT1G04730 // AT1G54440 // AT4G02070
GO:0030528	F	transcription regulator activity	5	70	1740	28397	0.43	1	// AT1G47870 // AT2G36010 // AT5G62020 // AT3G01330 // AT5G11510
GO:0005634	C	nucleus	57	70	9514	28397	2.5e-16	2.7e-14	// AT1G15570 // AT1G20930 // AT5G48600 // AT5G10480 // AT2G01910 // AT1G73690 // AT1G02970 // AT4G11570 // AT3G50630 // AT2G45490 // AT1G04730 // AT1G16330 // AT5G45550 // AT4G02070 // AT5G27620 // AT5G65420 // AT3G55000 // AT5G43080 // AT5G58003 // AT5G67260 // AT1G76540 // AT1G13170 // AT2G28450 // AT3G11520 // AT1G54440 // AT1G80370 // AT4G22910 // AT1G44110 // AT5G37630 // AT4G16970 // AT2G27…
GO:0044424	C	intracellular part	69	70	19957	28397	6e-10	2.9e-08	// AT1G15570 // AT5G23250 // AT5G48600 // AT3G49240 // AT2G01910 // AT1G73690 // AT4G16970 // AT4G11570 // AT3G50630 // AT2G45490 // AT4G04670 // AT1G04730 // AT1G16330 // AT5G45550 // AT4G02070 // AT5G65420 // AT3G55000 // AT5G43080 // AT2G25740 // AT5G67260 // AT1G76540 // AT4G24830 // AT3G07160 // AT1G77670 // AT2G28450 // AT5G10480 // AT3G11520 // AT1G13170 // AT1G54440 // AT1G80370 // AT4G22…
GO:0005622	C	intracellular	69	70	20042	28397	8e-10	2.9e-08	// AT1G15570 // AT5G23250 // AT5G48600 // AT3G49240 // AT2G01910 // AT1G73690 // AT4G16970 // AT4G11570 // AT3G50630 // AT2G45490 // AT4G04670 // AT1G04730 // AT1G16330 // AT5G45550 // AT4G02070 // AT5G65420 // AT3G55000 // AT5G43080 // AT2G25740 // AT5G67260 // AT1G76540 // AT4G24830 // AT3G07160 // AT1G77670 // AT2G28450 // AT5G10480 // AT3G11520 // AT1G13170 // AT1G54440 // AT1G80370 // AT4G22…
GO:0015630	C	microtubule cytoskeleton	8	70	122	28397	1.1e-09	3.1e-08	// AT3G55000 // AT4G21270 // AT2G04660 // AT2G01910 // AT2G45490 // AT3G60840 // AT2G35630 // AT3G48750
GO:0009574	C	preprophase band	5	70	16	28397	1.5e-09	3.4e-08	// AT3G55000 // AT2G35630 // AT2G01910 // AT3G60840 // AT3G48750
GO:0043231	C	intracellular membrane-bounded organelle	64	70	17343	28397	1.1e-08	1.5e-07	// AT1G15570 // AT5G23250 // AT5G48600 // AT3G49240 // AT2G01910 // AT1G73690 // AT1G02970 // AT4G11570 // AT3G50630 // AT2G45490 // AT1G04730 // AT1G16330 // AT5G45550 // AT4G02070 // AT5G65420 // AT3G55000 // AT5G43080 // AT5G58003 // AT5G67260 // AT1G76540 // AT4G24830 // AT3G07160 // AT1G77670 // AT2G28450 // AT5G10480 // AT3G11520 // AT1G13170 // AT1G54440 // AT1G80370 // AT4G22910 // AT4G38…
GO:0043227	C	membrane-bounded organelle	64	70	17349	28397	1.1e-08	1.5e-07	// AT1G15570 // AT5G23250 // AT5G48600 // AT3G49240 // AT2G01910 // AT1G73690 // AT1G02970 // AT4G11570 // AT3G50630 // AT2G45490 // AT1G04730 // AT1G16330 // AT5G45550 // AT4G02070 // AT5G65420 // AT3G55000 // AT5G43080 // AT5G58003 // AT5G67260 // AT1G76540 // AT4G24830 // AT3G07160 // AT1G77670 // AT2G28450 // AT5G10480 // AT3G11520 // AT1G13170 // AT1G54440 // AT1G80370 // AT4G22910 // AT4G38…
GO:0044430	C	cytoskeletal part	8	70	161	28397	9e-09	1.5e-07	// AT3G55000 // AT4G21270 // AT2G04660 // AT2G01910 // AT2G45490 // AT3G60840 // AT2G35630 // AT3G48750
GO:0043229	C	intracellular organelle	64	70	17570	28397	2.2e-08	2.5e-07	// AT1G15570 // AT5G23250 // AT5G48600 // AT3G49240 // AT2G01910 // AT1G73690 // AT1G02970 // AT4G11570 // AT3G50630 // AT2G45490 // AT1G04730 // AT1G16330 // AT5G45550 // AT4G02070 // AT5G65420 // AT3G55000 // AT5G43080 // AT5G58003 // AT5G67260 // AT1G76540 // AT4G24830 // AT3G07160 // AT1G77670 // AT2G28450 // AT5G10480 // AT3G11520 // AT1G13170 // AT1G54440 // AT1G80370 // AT4G22910 // AT4G38…
GO:0043226	C	organelle	64	70	17578	28397	2.3e-08	2.5e-07	// AT1G15570 // AT5G23250 // AT5G48600 // AT3G49240 // AT2G01910 // AT1G73690 // AT1G02970 // AT4G11570 // AT3G50630 // AT2G45490 // AT1G04730 // AT1G16330 // AT5G45550 // AT4G02070 // AT5G65420 // AT3G55000 // AT5G43080 // AT5G58003 // AT5G67260 // AT1G76540 // AT4G24830 // AT3G07160 // AT1G77670 // AT2G28450 // AT5G10480 // AT3G11520 // AT1G13170 // AT1G54440 // AT1G80370 // AT4G22910 // AT4G38…
GO:0005856	C	cytoskeleton	8	70	199	28397	4.4e-08	4.4e-07	// AT3G55000 // AT4G21270 // AT2G04660 // AT2G01910 // AT2G45490 // AT3G60840 // AT2G35630 // AT3G48750
GO:0043234	C	protein complex	16	70	1358	28397	1.7e-07	1.5e-06	// AT5G10480 // AT2G46560 // AT4G21270 // AT1G76540 // AT2G04660 // AT3G07160 // AT2G36010 // AT3G48750 // AT1G47870 // AT5G13840 // AT3G60840 // AT2G35630 // AT4G02070 // AT3G01330 // AT1G79280 // AT4G22910
GO:0005623	C	cell	69	70	22455	28397	1.5e-06	1.1e-05	// AT1G15570 // AT5G23250 // AT5G48600 // AT3G49240 // AT2G01910 // AT1G73690 // AT4G16970 // AT4G11570 // AT3G50630 // AT2G45490 // AT4G04670 // AT1G04730 // AT1G16330 // AT5G45550 // AT4G02070 // AT5G65420 // AT3G55000 // AT5G43080 // AT2G25740 // AT5G67260 // AT1G76540 // AT4G24830 // AT3G07160 // AT1G77670 // AT2G28450 // AT5G10480 // AT3G11520 // AT1G13170 // AT1G54440 // AT1G80370 // AT4G22…
GO:0044464	C	cell part	69	70	22455	28397	1.5e-06	1.1e-05	// AT1G15570 // AT5G23250 // AT5G48600 // AT3G49240 // AT2G01910 // AT1G73690 // AT4G16970 // AT4G11570 // AT3G50630 // AT2G45490 // AT4G04670 // AT1G04730 // AT1G16330 // AT5G45550 // AT4G02070 // AT5G65420 // AT3G55000 // AT5G43080 // AT2G25740 // AT5G67260 // AT1G76540 // AT4G24830 // AT3G07160 // AT1G77670 // AT2G28450 // AT5G10480 // AT3G11520 // AT1G13170 // AT1G54440 // AT1G80370 // AT4G22…
GO:0043232	C	intracellular non-membrane-bounded organelle	13	70	1109	28397	3e-06	2.1e-05	// AT3G55000 // AT4G21270 // AT5G48600 // AT1G79280 // AT2G01910 // AT2G04660 // AT1G47870 // AT2G45490 // AT3G60840 // AT1G04730 // AT2G35630 // AT4G02070 // AT3G48750
GO:0043228	C	non-membrane-bounded organelle	13	70	1109	28397	3e-06	2.1e-05	// AT3G55000 // AT4G21270 // AT5G48600 // AT1G79280 // AT2G01910 // AT2G04660 // AT1G47870 // AT2G45490 // AT3G60840 // AT1G04730 // AT2G35630 // AT4G02070 // AT3G48750
GO:0032991	C	macromolecular complex	17	70	2050	28397	7.8e-06	5.1e-05	// AT5G10480 // AT2G46560 // AT3G01330 // AT1G76540 // AT2G04660 // AT3G07160 // AT2G36010 // AT3G48750 // AT1G47870 // AT5G13840 // AT4G21270 // AT3G60840 // AT2G35630 // AT4G02070 // AT1G43190 // AT1G79280 // AT4G22910
GO:0044422	C	organelle part	15	70	3385	28397	0.017	0.098	// AT3G55000 // AT4G21270 // AT4G24830 // AT1G79280 // AT2G36010 // AT2G01910 // AT2G04660 // AT1G47870 // AT2G45490 // AT3G60840 // AT1G04730 // AT2G35630 // AT4G02070 // AT3G01330 // AT3G48750
GO:0044446	C	intracellular organelle part	15	70	3379	28397	0.017	0.098	// AT3G55000 // AT4G21270 // AT4G24830 // AT1G79280 // AT2G36010 // AT2G01910 // AT2G04660 // AT1G47870 // AT2G45490 // AT3G60840 // AT1G04730 // AT2G35630 // AT4G02070 // AT3G01330 // AT3G48750
GO:0044428	C	nuclear part	5	70	650	28397	0.023	0.12	// AT2G36010 // AT4G02070 // AT3G01330 // AT1G47870 // AT1G79280
GO:0044459	C	plasma membrane part	6	70	1065	28397	0.048	0.25	// AT5G37630 // AT3G07160 // AT5G13840 // AT2G35630 // AT1G79280 // AT4G22910
GO:0009507	C	chloroplast	6	70	3959	28397	0.94	1	// AT4G24830 // AT3G49240 // AT1G77670 // AT5G18820 // AT5G45550 // AT1G79280
GO:0044425	C	membrane part	7	70	2448	28397	0.4	1	// AT5G37630 // AT5G10480 // AT3G07160 // AT5G13840 // AT2G35630 // AT1G79280 // AT4G22910
GO:0005886	C	plasma membrane	11	70	3740	28397	0.31	1	// AT3G55000 // AT5G37630 // AT1G19835 // AT3G07160 // AT3G48750 // AT5G13840 // AT5G27970 // AT2G35630 // AT1G79280 // AT3G17020 // AT4G22910
GO:0044444	C	cytoplasmic part	19	70	9995	28397	0.94	1	// AT3G55000 // AT5G10480 // AT4G21270 // AT4G24830 // AT3G49240 // AT3G07160 // AT2G01910 // AT5G04040 // AT1G77670 // AT2G35630 // AT5G18820 // AT3G60840 // AT5G23250 // AT1G31870 // AT3G48750 // AT5G45550 // AT1G79280 // AT1G43190 // AT4G38890
GO:0009536	C	plastid	7	70	4037	28397	0.89	1	// AT4G24830 // AT3G49240 // AT2G01910 // AT1G77670 // AT5G18820 // AT5G45550 // AT1G79280
GO:0016020	C	membrane	12	70	6122	28397	0.85	1	// AT3G55000 // AT5G10480 // AT1G19835 // AT5G37630 // AT3G07160 // AT3G48750 // AT5G13840 // AT5G27970 // AT2G35630 // AT1G79280 // AT3G17020 // AT4G22910
GO:0005737	C	cytoplasm	28	70	12233	28397	0.74	1	// AT4G24830 // AT3G49240 // AT2G01910 // AT5G23250 // AT5G45550 // AT5G27620 // AT3G55000 // AT4G21270 // AT3G07160 // AT1G77670 // AT1G31870 // AT1G79280 // AT1G43190 // AT1G44110 // AT5G10480 // AT1G19835 // AT2G27970 // AT3G48750 // AT5G04040 // AT5G18820 // AT4G04670 // AT2G35630 // AT3G01330 // AT1G47210 // AT4G38890 // AT3G60840 // AT5G27970 // AT3G17020
